# Supplementary material for: Efficient and stable all-small-molecule solar cells enabled by incorporating a designed giant molecule acceptor
Source: Royal Society of Chemistry journal article supplement (doi:10.1039/d4ee01705f), 2024-01-01
Supplement: d4ee01705f1.pdf [file d4ee01705f1.pdf]

## Supplementary Information

### 1. Experimental Section

#### Materials

BTP-eC9 and PNDIT-F3N were purchased from Organtec. Ltd. Chloroform was distilled from CaH<sub>2</sub> prior to use. Other reagents used were purchased from commercial sources and used as received. Compound (**I**) 12,13-bis(2-butyloctyl)-3,9-diundecyl-12,13-dihydro-[1,2,5]thiadiazolo[3,4-e]thieno[2'',3''':4',5']thieno[2',3':4,5]pyrrolo[3,2-g]thieno[2',3':4,5]thieno[3,2-b]indole-2,10-dicarbaldehyde was synthesized according to the procedures outlined in the literatures.<sup>1, 2</sup> The synthetic route of Se-Giant was shown in **Scheme S1**. <sup>1</sup>HNMR spectra was measured on Bruker AVANCE 600 MHz and JEOL JNM-ECZ 400MHz spectrometer with *d* chloroform as the solvent. The chemical shifts were reported as  $\delta$  value (ppm) relative to an internal tetramethylsilane (TMS) standard. Mass spectra (MALDI-TOF-MS) were determined using AB SCIEX 5800 Mass Spectrometer.

#### Synthesis of Se-Giant

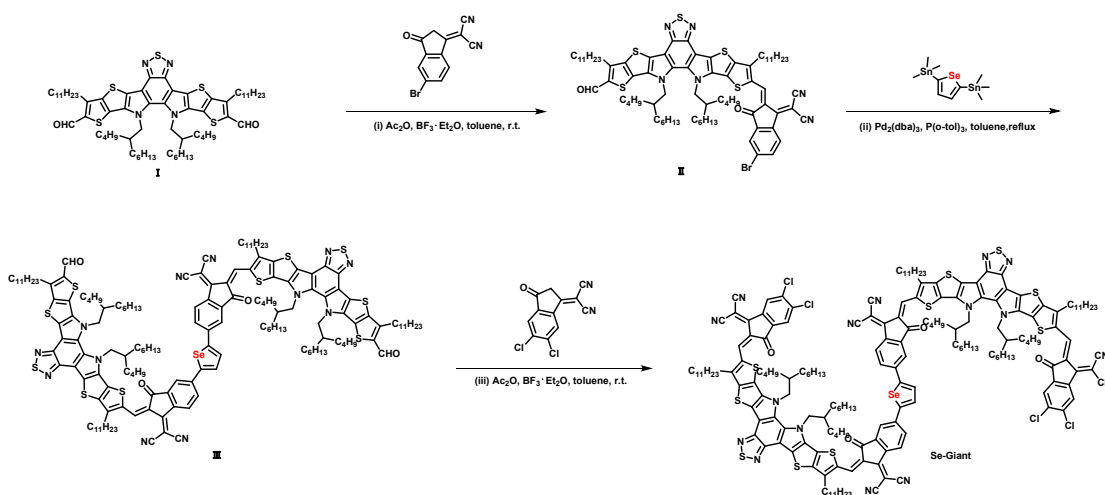

**Scheme S1.** The overall synthetic route to Se-Giant. Reagents and conditions: (i) 2-(5-bromo-3-oxo-2,3-dihydro-1H-inden-1-ylidene)malononitrile, Ac<sub>2</sub>O, BF<sub>3</sub>·Et<sub>2</sub>O, toluene, room temperature; (ii) 2,5-bis(trimethylstannyl)selenophene, Pd<sub>2</sub>(dba)<sub>3</sub>, P(*o*-

tol)<sub>3</sub>, toluene, reflux; (iii) 2-(5,6-dichloro-3-oxo-2,3-dihydro-1*H*-inden-1-ylidene)malononitrile, Ac<sub>2</sub>O, BF<sub>3</sub>·Et<sub>2</sub>O, toluene, room temperature.

**Synthesis of compound II.** Under the protection of argon, compound I (500 mg, 0.439 mmol, 1.0 eq.), 2-(5-bromo-3-oxo-2,3-dihydro-1*H*-inden-1-ylidene)malononitrile (180mg, 0.658 mmol, 1.5 eq.), acetic anhydride (0.5 mL) and dry toluene (15 mL) was added to 50 mL two-necked round bottom flask. BF<sub>3</sub>·Et<sub>2</sub>O (0.5 mL) was added dropwise to the mixture solution at 0 °C. Then the mixture was stirred at room temperature. After 30 mins, the reaction mixture was precipitated in methanol (100 mL). The precipitate was purified by flash silica gel chromatography with petroleum ether/ dichloromethane (v/v=1/1) as eluent to afford the compound II (260 mg, 42%).

<sup>1</sup>H NMR (600 MHz, Chloroform-*d*) δ 10.16 (s, 1H), 9.17 (s, 1H), 8.55 (d, *J* = 8.3 Hz, 1H), 8.02 (d, *J* = 1.9 Hz, 1H), 7.84 (dd, *J* = 8.4, 2.0 Hz, 1H), 4.74 (d, *J* = 7.7 Hz, 2H), 4.66 (d, *J* = 7.8 Hz, 2H), 3.21 (td, *J* = 8.0, 2.7 Hz, 4H), 2.09 (p, *J* = 6.3 Hz, 2H), 1.96 - 1.85 (m, 4H), 1.50 (dt, *J* = 15.7, 7.9 Hz, 4H), 1.41 - 1.35 (m, 4H), 1.28 - 1.25 (m, 12H), 1.17-1.10 (m, 12H), 1.06 - 0.92 (m, 32H), 0.87 - 0.78 (m, 18H).

**Synthesis of compound III.** The compound II (260 mg, 0.186 mmol, 3.0 eq.), 2,5-bis(trimethylstannyl)selenophene (28.4 mg, 0.062 mmol, 1.0 eq.), Pd<sub>2</sub>(dba)<sub>3</sub> (2.8 mg, 3.0 μmol, 0.05 eq.), and P(*o*-tol)<sub>3</sub> (9.1 mg, 0.03 mmol, 0.5 eq.) were added into 100 mL two-necked round bottom flask and dissolved in toluene (30 mL). The flask was purged with nitrogen and sealed under nitrogen flow. The resulting mixture was stirred and heated to reflux overnight. After cooling to room temperature, the mixture solution was poured into methanol (100 mL). The precipitate was purified by silica gel column chromatography with petroleum ether/chloroform (v/v=1/1) as eluent to obtain compound III (79 mg, 79%).

<sup>1</sup>H NMR (600 MHz, Chloroform-*d*) δ 10.17 (s, 2H), 9.15 (s, 2H), 8.74 (d, *J* = 8.1 Hz, 2H), 8.05 (s, 2H), 7.91 (dd, *J* = 8.0, 1.9 Hz, 2H), 7.79 (s, 2H), 4.84 – 4.73 (m, 4H), 4.71 - 4.65 (m, 4H), 3.22 (t, *J* = 7.9 Hz, 8H), 2.17 (s, 4H), 2.11 (d, *J* = 17.0 Hz, 4H), 1.94 (p,

$J = 7.8$  Hz, 4H), 1.90 - 1.85 (m, 4H), 1.53 - 1.34 (m, 18H), 1.33 - 1.21 (m, 60H), 1.11 - 0.93 (m, 34H), 0.92 - 0.80 (m, 24H), 0.74 - 0.62 (m, 24H).

**Synthesis of compound Se-Giant.** Under the protection of nitrogen, compound III (79.0 mg, 0.028 mmol, 1.0 eq.), 2-(5,6-dichloro-3-oxo-2,3-dihydro-1*H*-inden-1-ylidene)malononitrile (30.1 mg, 0.114 mmol, 4.0 eq.), acetic anhydride (0.1 mL) and dry toluene (5 mL) was added to 25 mL two-necked round bottom flask. Then  $\text{BF}_3 \cdot \text{Et}_2\text{O}$  (0.5 mL) was added dropwise to the mixture solution at room temperature. After 30 mins, the reaction mixture was precipitated in methanol (100 mL). The precipitate was purified by column chromatography on silica gel with petroleum ether/chloroform (v/v=1/2) as eluent to afford Se-Giant (35 mg, 38%).

$^1\text{H}$  NMR (600 MHz, Chloroform-*d*, room temperature)  $\delta$  9.21 (s, 2H), 8.93 (s, 2H), 8.77 (s, 4H), 8.07 (d,  $J = 8.1$  Hz, 2H), 8.01 (s, 2H), 7.84 (s, 2H), 7.59 (s, 2H), 4.90 - 4.77 (m, 8H), 3.27 (s, 4H), 3.12 (s, 4H), 2.24 (s, 2H), 2.17 (s, 2H), 2.05 - 1.98 (m, 4H), 1.92 (s, 4H), 1.82 (s, 4H), 1.67 - 1.47 (m, 64H), 1.43 - 1.22 (m, 56H), 0.91 - 0.59 (m, 40H).

$^1\text{H}$  NMR (400 MHz, Chloroform-*d*, 323.15K)  $\delta$  9.18 (s, 2H), 8.96 (s, 2H), 8.74 (d,  $J = 9.6$  Hz, 4H), 8.04 - 7.96 (m, 4H), 7.80 (s, 2H), 7.63 (s, 2H), 4.85 (s, 8H), 3.26 (t,  $J = 7.9$  Hz, 4H), 3.13 (t,  $J = 7.9$  Hz, 4H), 2.26 - 2.15 (m, 4H), 1.95 - 1.89 (m, 4H), 1.87 - 1.80 (m, 4H), 1.32 - 1.24 (m, 68H), 1.14 - 1.03 (m, 24H), 1.03 - 0.94 (m, 21H), 0.91 - 0.81 (m, 27H), 0.76 - 0.61 (m, 24H).

MALDI-TOF MS (m/z): calcd for  $\text{C}_{184}\text{H}_{208}\text{Cl}_4\text{N}_{16}\text{O}_4\text{S}_{10}\text{Se}$ : 3248.1695 Found: 3248.5773.

**Nuclear magnetic resonance (NMR):**  $^1\text{H}$  NMR spectrum was recorded on Bruker AVANCE NEO 600 MHz spectrometer with *d* chloroform as the solvent. The chemical shifts were reported as  $\delta$  value (ppm) relative to an internal tetramethylsilane (TMS) standard.

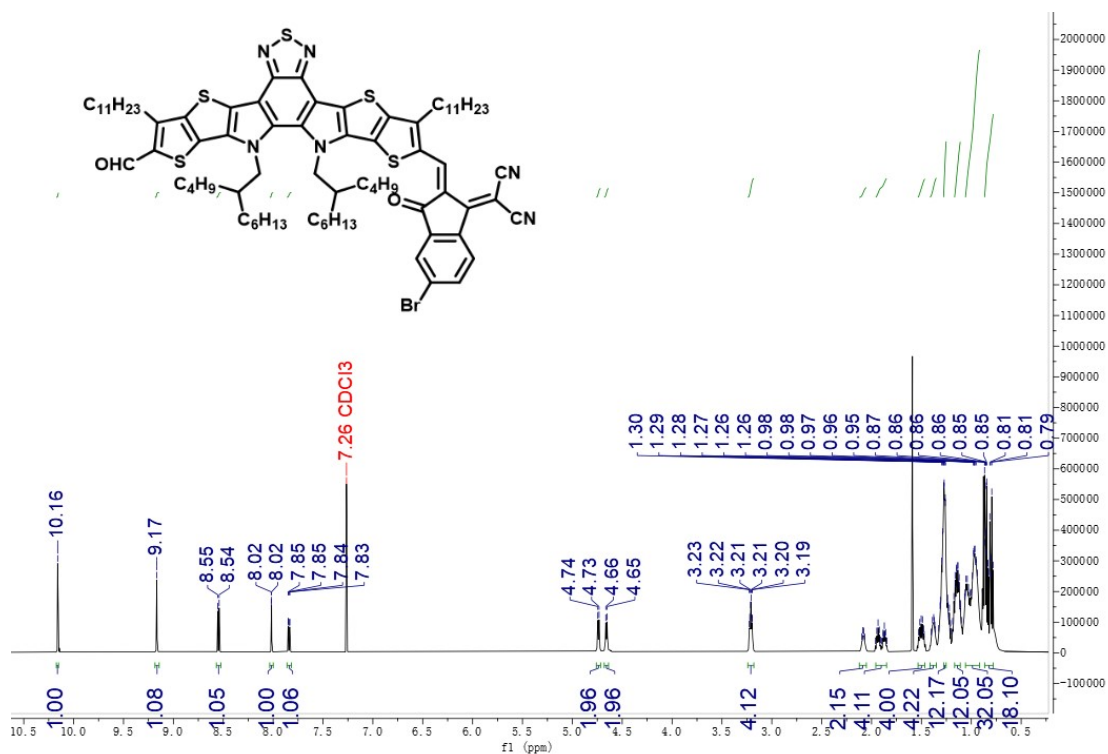

**Figure S1.**  $^1\text{H}$  NMR of compound II.

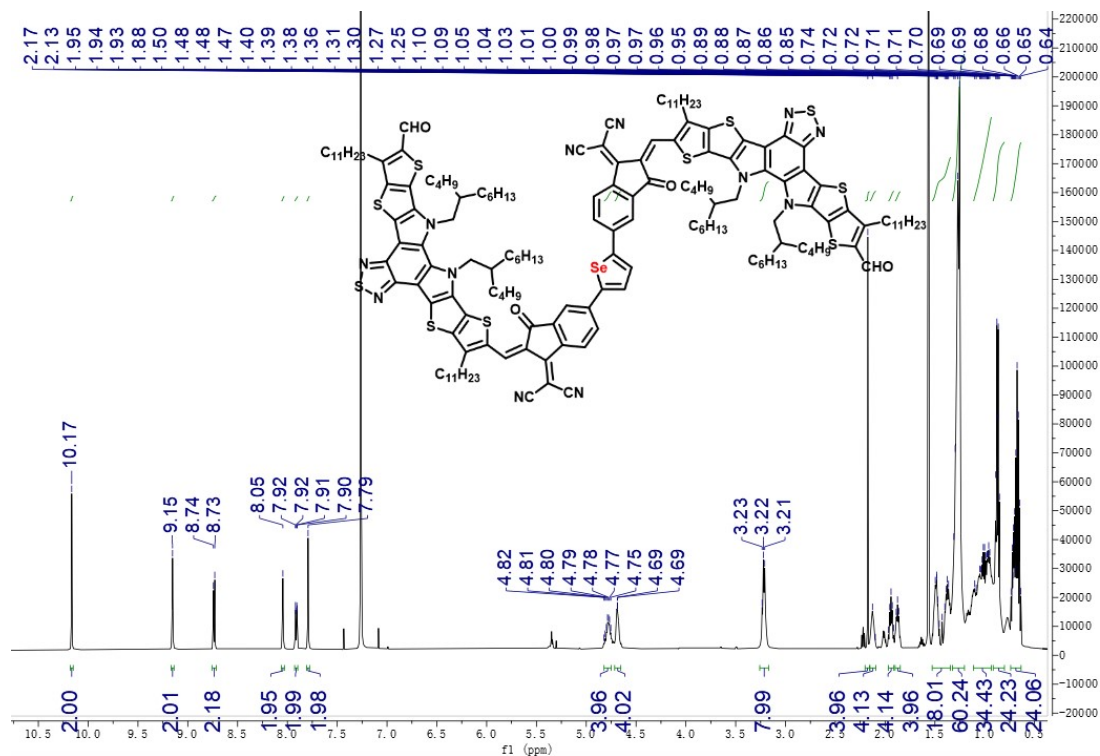

**Figure S2.**  $^1\text{H}$  NMR of compound III.

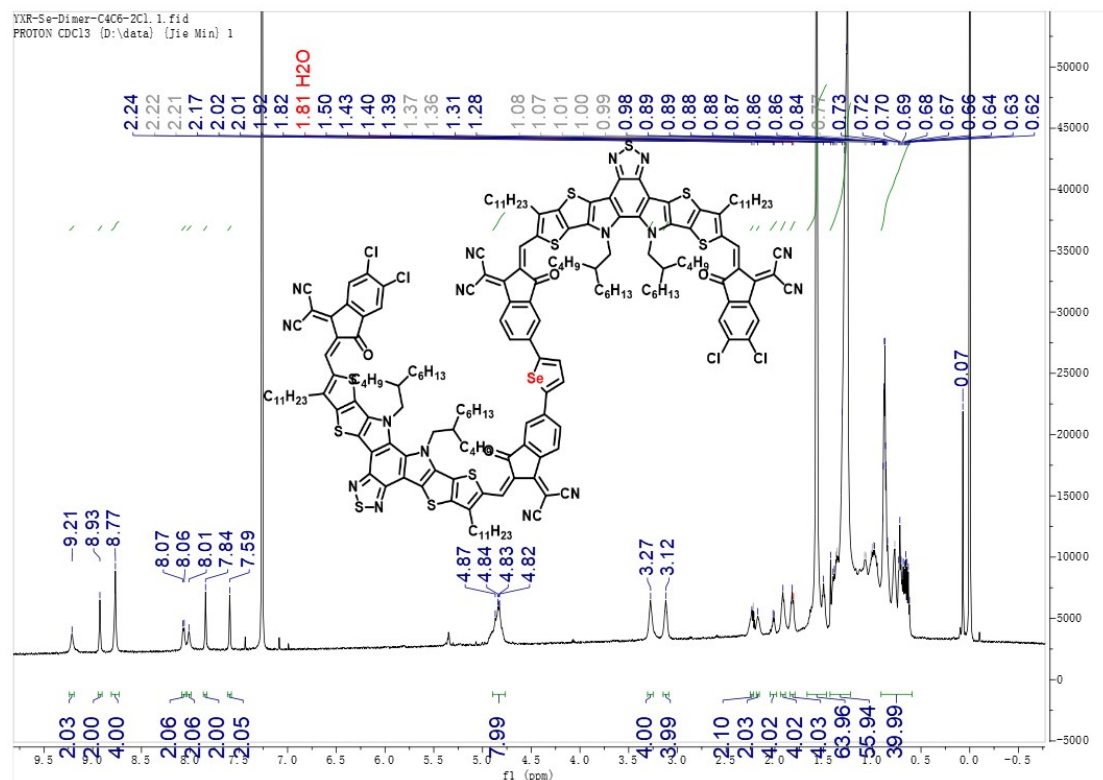

**Figure S3.**  $^1\text{H}$ -NMR spectrum of giant molecule acceptor Se-Giant (600M, r.t.).



**Electrochemical characterizations:** Electrochemical properties were studied by cyclic voltammetry (CV), which was performed on a CS350H electrochemical workstation with a three-electrode system in a 0.1 M Bu<sub>4</sub>NPF<sub>6</sub> acetonitrile solution at a scan rate of 100 mV s<sup>-1</sup>. Glassy carbon disc coated with sample film was used as the working electrode. A Pt wire was used as the counter electrode and Ag/AgCl was used as the reference electrode. The HOMO/LUMO energy levels ( $E_{\text{HOMO}}/E_{\text{LUMO}}$ ) can be calculated from onset oxidation/reduction potentials ( $\phi_{\text{OX}}/\phi_{\text{Red}}$ ) in the cyclic voltammograms according to the equations of  $E_{\text{HOMO}}/E_{\text{LUMO}} = -e(\phi_{\text{OX}}/\phi_{\text{Red}} + 4.8 - \phi_{\text{Fe/Fe}^+})$  (eV) (eV), where  $\phi_{\text{Fe/Fe}^+}$  is the redox potential of ferrocene/ferrocenium (Fe/Fc<sup>+</sup>) couple in the electrochemical measurement system, and the energy level of Fe/Fc<sup>+</sup> was taken as 4.8 eV below vacuum.

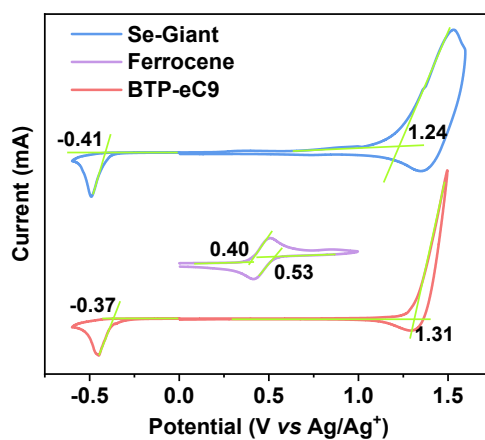

**Figure S6.** Cyclic voltammetry curves of Ferrocene, Se-Giant, and BTP-eC9 in acetonitrile solution with 0.1 M n-Bu<sub>4</sub>PF<sub>6</sub> as the supporting electrolyte, at with a scanning rate of 100 mV s<sup>-1</sup>.

**Optical measurements and simulations:** Ultraviolet-visible near-infrared (UV-vis-NIR) absorption spectra were recorded with a Perkin-Elmer Lambda 365 UV-Vis spectrophotometer from 300 nm to 1100 nm.

**Table S1.** Optical and electrochemical properties of MPhS-C2, Se-Giant and BTP-eC9.

| Materials | $\lambda_{\text{max,sol}}$<br>(nm) | $\lambda_{\text{max,film}}$<br>(nm) | $\lambda_{\text{onset,film}}$<br>(nm) | $E_g^a$<br>(eV) | LUMO/HOMO <sup>b</sup><br>(eV) |
|-----------|------------------------------------|-------------------------------------|---------------------------------------|-----------------|--------------------------------|
| MPhS-C2   | --                                 | 585                                 | 705                                   | 1.76            | -3.45/-5.35                    |
| Se-Giant  | 743                                | 797                                 | 891                                   | 1.39            | -3.92/-5.57                    |
| BTP-eC9   | 747                                | 833                                 | 917                                   | 1.35            | -3.97/-5.65                    |

<sup>a</sup>) Calculated from the absorption onset of the films. <sup>b</sup>) Estimated from the reduction/oxidation onset of the CV curves.



***Differential scanning calorimetry (DSC) measurements:*** DSC (DSC Q2000 V24.11 Build 124) curves were performed at a heating and cooling rate of 10°C min<sup>-1</sup> under nitrogen atmosphere.

**Space charge limited current (SCLC) measurements:** Single carrier devices were fabricated and the dark current-voltage characteristics measured and analyzed in the space charge limited (SCL) regime following the references. The structure of hole only devices was Glass/ITO/PEDOT:PSS/Active layer/MoO<sub>3</sub> (10nm)/Ag (100 nm). For the electron only devices, the structure was Glass/ITO/ZnO/Active layer/PNDIT-F3N/Ag (100 nm), where the Ag were evaporated. The  $J$ - $V$  characteristics of both hole-only and electron-only diodes can be excellently fit to the Mott-Gurney relation for space charge

limited current:  $J_{SCL} = \frac{9}{8} \epsilon_0 \epsilon_r \mu \frac{V_{in}^2}{L^3} \exp\left(\frac{0.89 \times \beta}{\sqrt{L}} \sqrt{V_{in}}\right)$ , Where  $J_{SCL}$  is the current density,  $\epsilon_0$  is the permittivity of free-space,  $\epsilon_r$  is the relative dielectric constant of the active layer,  $\mu$  is the charge carrier mobility,  $\beta$  is the field activation factor,  $L$  is the thickness of the device and  $V_{in}$  is the voltage dropped across the sample.

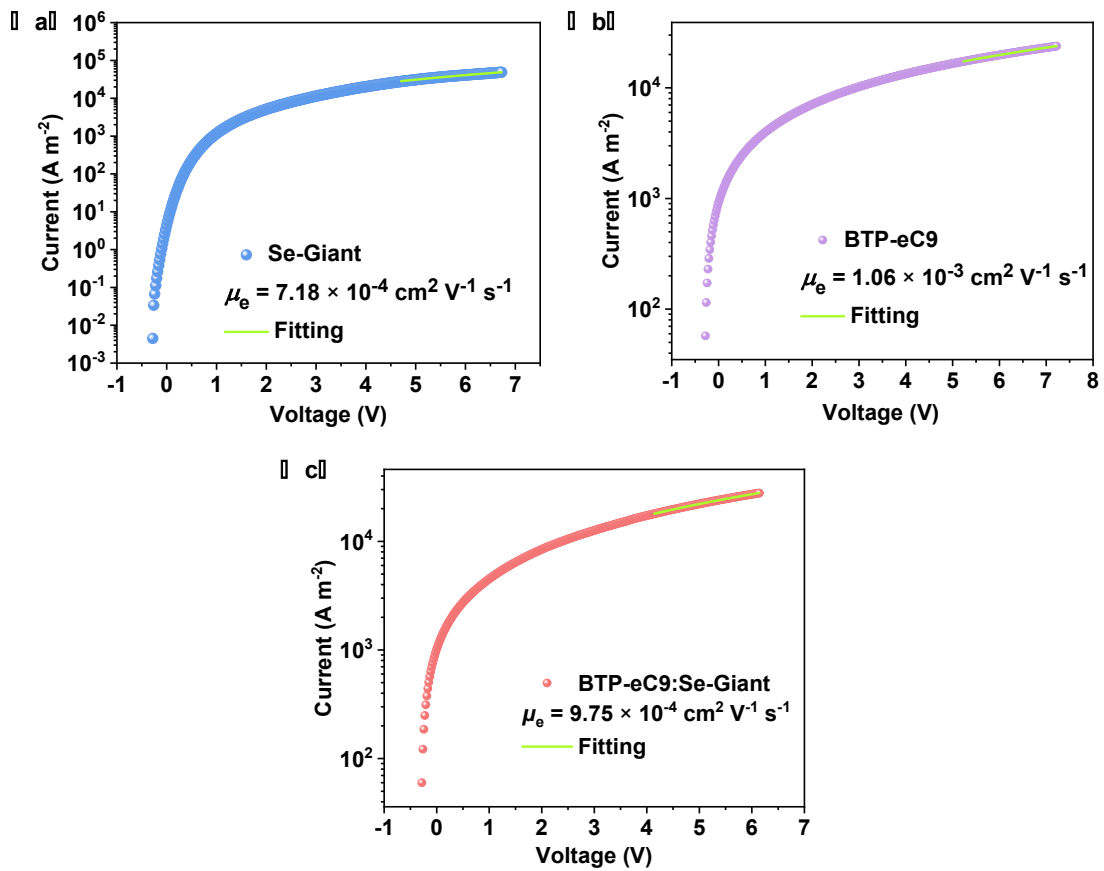

**Figure S7.** The dark  $J$ - $V$  characteristics of pristine (a) Se-Giant, (b) BTP-eC9, and (c) BTP-eC9:Se-Giant (0.8:0.2, wt%) films-based electron-only devices. The solid lines represent the best fitting using the SCLC model.

**Grazing incidence wide angle X-ray scattering (GIWAXS) characterization:**

GIWAXS measurements with  $K\alpha$  X-ray of Cu source (8.05 keV, 1.54 Å) and a Pilatus3R 300 K detector were conducted at a Xeuss 2.0 WAXS laboratory beamline. Samples were prepared by spin coating identical chloroform blend solutions as those used in devices on Si substrates. The grazing incident angle was 0.18°.

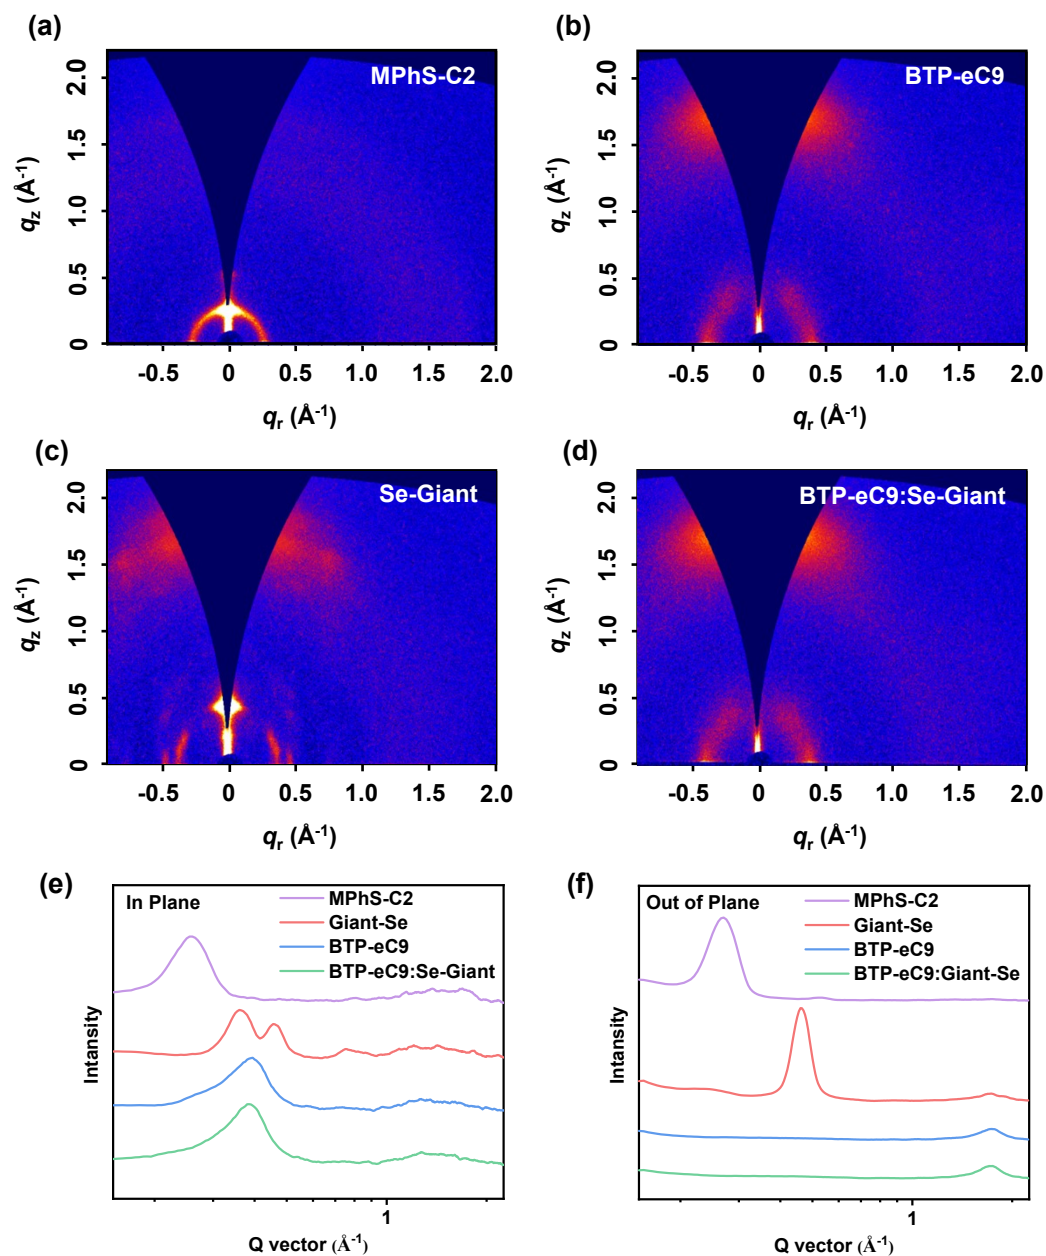

**Figure S8.** 2D GIWAXS patterns of (a) MPhS-C2, (b) BTP-eC9, (c) Se-Giant (d) BTP-eC9:Se-Giant (0.8:0.2, wt%) films; Scattering profiles of in-plane (IP) (e) and out-of-plane (OOP) (f) for the corresponding films.

**Table S2.** Investigations of the morphology parameters extracted from the GIWAXS measurements of the MPhS-C2, Se-Giant, BTP-eC9 and BTP-eC9:Se-Giant (1:0.2, wt%) films.

| Neat films       | In-plane (100)               |                               | Out-of-plane (010)           |                               |                               |                                      |
|------------------|------------------------------|-------------------------------|------------------------------|-------------------------------|-------------------------------|--------------------------------------|
|                  | $q$<br>( $\text{\AA}^{-1}$ ) | d-spacing<br>( $\text{\AA}$ ) | $q$<br>( $\text{\AA}^{-1}$ ) | d-spacing<br>( $\text{\AA}$ ) | FWHM<br>( $\text{\AA}^{-1}$ ) | Coherence<br>length ( $\text{\AA}$ ) |
| MPhS-C2          | 0.26                         | 24.17                         | /                            | /                             | /                             | /                                    |
| Se-Giant         | 0.36                         | 17.45                         | 1.73                         | 3.63                          | 0.39                          | 16.07                                |
| BTP-eC9          | 0.40                         | 15.90                         | 1.74                         | 3.62                          | 0.31                          | 20.06                                |
| BTP-eC9:Se-Giant | 0.38                         | 16.32                         | 1.74                         | 3.60                          | 0.32                          | 19.64                                |

**Contact angle measurements and surface energy calculation:** The contact angles of two acceptors (BTP-eC9 and Se-Giant), donor MPhS-C2 and the blend of BTP-eC9:Se-Giant were measured using a Contact Angle Analyzer. The contact angles of two different solvents (water and ethylene glycol (EG)) on the neat films were used to calculate the surface tension of each film by the Wu model.

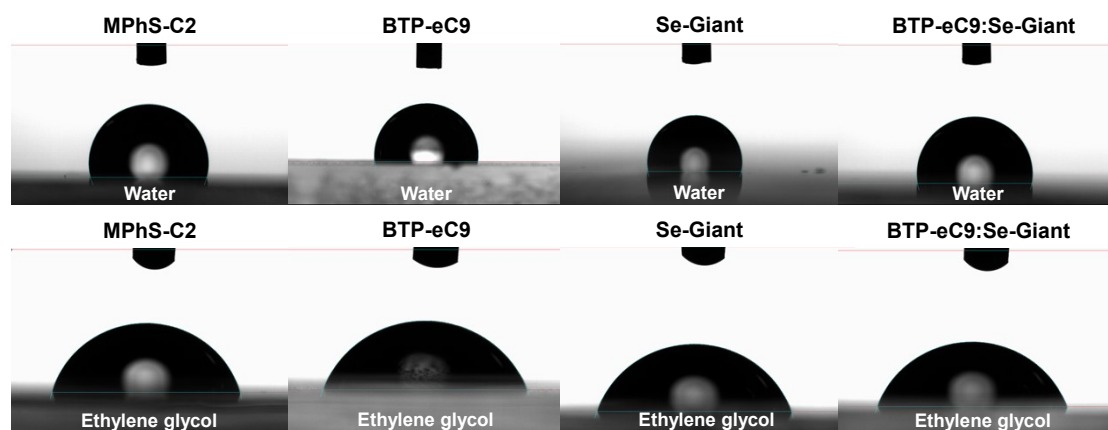

**Figure S9.** Photographs of water and ethylene glycol droplets on the top surfaces of MPhS-C2, BTP-eC9, Se-Giant and BTP-eC9:Se-Giant. The contact angle measurement is conducted at the center of the substrates, avoiding the edges of the ITO anodes. The contact angles of two different solvents on the neat films were used to calculate the surface tension of each film by the Owens-Wendt method.<sup>3</sup>

**Table S3.** Investigations of the contact angles, surface energy, wetting coefficient and Flory–Huggins interaction parameter ( $\chi$ ) values of MPhS-C2, BTP-eC9 and BTP-eC9:Se-Giant.

| Materials        | Contact angles (°)    |                     | Surface energy<br>(mN m <sup>-1</sup> ) | Relative $\chi$ values <sup>a</sup> |                |
|------------------|-----------------------|---------------------|-----------------------------------------|-------------------------------------|----------------|
|                  | Water                 | Ethylene glycol     |                                         | (With MPhS-C2)                      | (With BTP-eC9) |
| MPhS-C2          | 104.9<br>(104.9±0.06) | 74.3<br>(74.3±0.03) | 55.25<br>(55.25±0.08)                   | /                                   | /              |
| BTP-eC9          | 97.9<br>(97.9±0.07)   | 68.5<br>(68.5±0.04) | 45.32<br>(45.32±0.09)                   | 0.25K                               | /              |
| Se-Giant         | 101.2<br>(101.2±0.05) | 71.3<br>(71.3±0.06) | 48.28<br>(48.28±0.08)                   | 0.08 K                              | 0.05 K         |
| BTP-eC9:Se-Giant | 99.7<br>(99.7±0.04)   | 70.3<br>(70.3±0.05) | 46.00<br>(46.00±0.06)                   | 0.20 K                              | /              |

<sup>a</sup>The Flory-Huggins interaction parameter  $\chi_{D-A}$  is derived using the empirical equation<sup>4</sup>:  $\chi_{D-A} = K(\sqrt{\gamma_D} - \sqrt{\gamma_A})^2$ , where  $K$  is a positive constant;  $\gamma_D$  and  $\gamma_A$  are surface

tensions obtained from contact angle measurements,  $\chi$  is the Flory-Huggins interaction parameter.

### **Device Fabrication and Testing**

Solar cells were fabricated in a conventional device configuration of ITO/PEDOT:PSS (40nm)/MPhS-C2:acceptors/PNDIT-F3N/Ag. Pre-patterned ITO-coated glass substrates (purchased from South China Science & Technology Company Limited) washed with methylbenzene, deionized water, acetone and isopropyl alcohol in an ultrasonic bath for 15 min each. After blow-dried by high-purity nitrogen, All ITO substrates are cleaned in ultraviolet ozone cleaning system for 15 min. Subsequently, a thin layer of PEDOT: PSS (Xi'an Yuri Solar Co., Ltd.) was deposited through spin-coating at 4500 rpm for 30s on pre-cleaned ITO-coated glass from a PEDOT: PSS aqueous solution and annealed at 150 °C for 15 min in atmospheric air. The MPhS-C2: acceptor blends (1.7:1 weight ratio) were dissolved in chloroform solution with 0.25% additive of 1,8-diiodooctane (DIO). The total concentration of blend solutions was 18 mg mL<sup>-1</sup> for all blends and stirred at 45 °C for 3 hours. The blend solution was spin-coated at 3200 rpm for 30 s. Then the device thermal annealed at 115 °C for 7 min, and solvent (CF) annealed for 60 seconds. The thickness optimal active layer measured by a Bruker Dektak XT stylus profilometer was about 110 nm. Then methanol solution of PNDIT-F3N at a concentration of 0.5 mg mL<sup>-1</sup> was spin-coated onto the active layer at 4000 rpm for 30s. Finally, the top argentum electrode of 100 nm thickness was thermally evaporated through a mask onto the cathode buffer layer under a vacuum of  $\sim 5 \times 10^{-6}$  mbar. The typical active area of the investigated devices was 0.048 cm<sup>2</sup> and the area of a non-refractive mask used was 0.0289 cm<sup>2</sup>. The current-voltage characteristics of the solar cells were measured by a Keithley 2400 source meter unit under AM1.5G (100 mW cm<sup>-2</sup>) irradiation from a solar simulator (Enlitech model SS-X160R). Solar simulator illumination intensity was determined at 100 mW cm<sup>-2</sup> using a monocrystalline silicon reference cell with a KG5 filter. Short circuit currents under AM1.5G (100 mW cm<sup>-2</sup>) conditions were estimated from the spectral response and convolution with the solar spectrum. The forward scan was adopted to test the  $J-V$

curves, and the scan step is 0.02 V and the delay time is 1 ms. The scan mode is sweep.

***External quantum efficiency (EQE) measurements:*** The external quantum efficiency was measured by a Solar Cell Spectral Response Measurement System QE-R3011(Enli Technology Co., Ltd.).

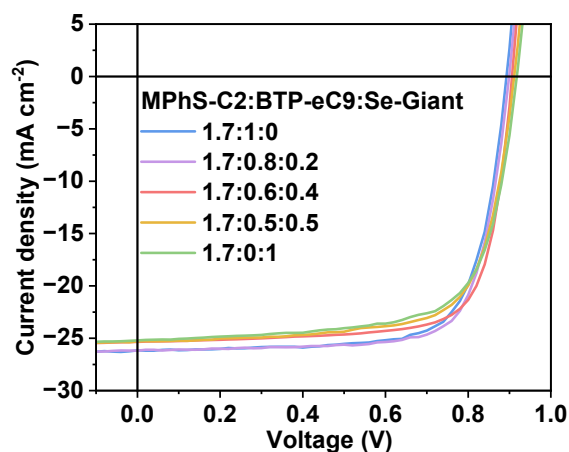

**Figure S10.**  $J$ - $V$  characteristics for devices based on MPhS-C2:BTP-eC9:Se-Giant, with different Se-Giant ratio in acceptor, measured under the illumination of AM 1.5 G at  $100 \text{ mW cm}^{-2}$ .

**Table S4.** Summary of photovoltaic parameters of the all-SMOSCs based on MPhS-C2:BTP-eC9:Se-Giant with different Se-Giant ration, measured under the illumination of AM 1.5 G at  $100 \text{ mW cm}^{-2}$ .

| MPhS-C2:BTP-eC9:Se-Giant | $V_{OC}$<br>(V) | $J_{SC}$<br>( $\text{mA/cm}^2$ ) | FF<br>(%) | PCE<br>(%)            |
|--------------------------|-----------------|----------------------------------|-----------|-----------------------|
| 1.7:1:0                  | 0.892           | 26.16                            | 73.66     | 17.19<br>(16.98±0.10) |
| 1.7:0.8:0.2              | 0.903           | 26.34                            | 76.33     | 18.16<br>(18.01±0.12) |
| 1.7:0.6:0.4              | 0.907           | 25.32                            | 75.39     | 17.31<br>(17.12±0.10) |
| 1.7:0.5:0.5              | 0.911           | 25.30                            | 71.91     | 16.58<br>(16.22±0.15) |
| 1.7:0:1                  | 0.918           | 25.21                            | 70.34     | 16.28<br>(16.02±0.12) |

<sup>a)</sup>The average PCE values with standard deviations were obtained from 10 independent cells.



**Table S5.** Summary of  $E_{\text{loss}}$ , PCE and the corresponding photovoltaic parameters of all-SMOSCs

| Donor        | Acceptor            | $V_{\text{OC}}$<br>(V) | $J_{\text{SC}}$<br>(mA cm <sup>-2</sup> ) | FF<br>(%) | PCE<br>(%) | $E_{\text{loss}}$<br>(eV) | Reference |
|--------------|---------------------|------------------------|-------------------------------------------|-----------|------------|---------------------------|-----------|
| H11          | IDIC                | 0.977                  | 15.21                                     | 65.46     | 9.73       | 0.673                     | 5, 6      |
| H12          | IDIC                | 0.955                  | 10.51                                     | 54.89     | 5.51       | 0.695                     |           |
| BTID-2F      | IDIC                | 0.9                    | 13.98                                     | 65.20     | 8.23       | 0.75                      | 5, 7      |
| NDT-3T-R4    | IDIC-4F             | 0.76                   | 17.02                                     | 71.4      | 9.2        | 0.86                      | 5, 8      |
| NDT-3T-R6    | IDIC-4F             | 0.78                   | 18.89                                     | 72.8      | 10.7       | 0.84                      |           |
| ZnP2BT-RH    | PC <sub>71</sub> BM | 0.845                  | 17.66                                     | 67.15     | 10.02      | 0.56                      | 9         |
| ZnP-TBO      | 6TIC                | 0.80                   | 20.44                                     | 73.87     | 12.08      | 0.57                      | 5, 10     |
| ZnP-TBO      | 6TIC                | 0.84                   | 14.92                                     | 47.87     | 6.0        | 0.53                      |           |
| BSFTR        | Y6                  | 0.85                   | 23.16                                     | 69.66     | 13.69      | 0.48                      | 11        |
| BTR          | Y6                  | 0.85                   | 22.25                                     | 56.4      | 10.67      | 0.53                      | 5, 12     |
| BTR-C1       | Y6                  | 0.86                   | 24.17                                     | 65.5      | 13.61      | 0.52                      |           |
| ZR1          | IDIC-4Cl            | 0.776                  | 18.27                                     | 67.96     | 9.64       | 0.78                      | 13        |
| ZR1          | Y6                  | 0.861                  | 24.34                                     | 68.44     | 14.34      | 0.54                      |           |
| BDTF-CA      | IDIC-4F             | 0.88                   | 14.96                                     | 63.95     | 8.42       | 0.74                      | 5, 14     |
| BDTF-CA      | IDIC                | 0.99                   | 12.09                                     | 51.14     | 6.12       | 0.66                      |           |
| BDTF-CA      | IDIC-2F             | 0.94                   | 16.69                                     | 58.07     | 9.11       | 0.65                      |           |
| BSCl-C2      | IDIC-4Cl            | 0.865                  | 20.1                                      | 71.3      | 12.40      | 0.655                     | 15        |
| ZR2-C1       | Y6                  | 0.848                  | 21.35                                     | 65.12     | 11.79      | 0.532                     | 5, 16     |
| ZR2-C2       | Y6                  | 0.852                  | 23.03                                     | 65.43     | 12.84      | 0.528                     |           |
| ZR2-C3       | Y6                  | 0.854                  | 24.69                                     | 70.06     | 14.78      | 0.526                     |           |
| SM1          | Y6                  | 0.805                  | 23.59                                     | 67.0      | 12.72      | 0.575                     | 17        |
| SM1-F        | Y6                  | 0.866                  | 23.25                                     | 69.9      | 14.07      | 0.514                     |           |
| SM1-S        | Y6                  | 0.825                  | 23.23                                     | 67.7      | 12.95      | 0.555                     |           |
| BTEC-1F      | Y6                  | 0.87                   | 21.21                                     | 61.35     | 11.33      | 0.51                      | 5, 18     |
| BTEC-2F      | Y6                  | 0.854                  | 21.55                                     | 72.35     | 13.34      | 0.526                     |           |
| BTEC-2F      | Y6                  | 0.895                  | 14.51                                     | 51.54     | 6.69       | 0.485                     |           |
| BSCl         | IDIC-4Cl            | 0.9                    | 7.7                                       | 33.9      | 2.35       | 0.723                     | 9         |
| BSCl(TA)     | IDIC-4Cl            | 0.845                  | 19.1                                      | 65.6      | 10.57      | 0.745                     |           |
| BSCl(TA+SVA) | IDIC-4Cl            | 0.865                  | 21.5                                      | 70.0      | 13.03      | 0.721                     |           |
| B1           | BO-4Cl              | 0.83                   | 25.27                                     | 73        | 15.3       | 0.567                     | 5, 19     |
| BTR          | BO-4Cl              | 0.83                   | 18.93                                     | 72        | 11.3       | 0.567                     |           |
| BT-2F        | N3                  | 0.876                  | 19.19                                     | 48.12     | 8.09       | 0.493                     | 20        |
| BT-2F(CS2)   | N3                  | 0.845                  | 24.28                                     | 75.02     | 15.39      | 0.521                     |           |
| BT-2F(TA)    | N3                  | 0.829                  | 24.51                                     | 72.15     | 14.66      | 0.529                     |           |
| B1           | BO-4Cl:BO-2Cl       | 0.84                   | 26.05                                     | 78.0      | 17.0       | 0.57                      | 21        |
| FBD-S3       | Y6                  | 0.849                  | 27.11                                     | 67.74     | 12.53      | 0.531                     | 5, 22     |
| TBD-S4       | Y6                  | 0.854                  | 24.53                                     | 72.10     | 15.10      | 0.526                     |           |
| C-2F         | N3                  | 0.85                   | 24.87                                     | 69.33     | 14.64      | 0.516                     | 23        |
| C-F          | N3                  | 0.79                   | 20.51                                     | 47.52     | 7.76       | 0.576                     |           |

|              |                  |       |       |       |       |       |           |
|--------------|------------------|-------|-------|-------|-------|-------|-----------|
| M-PhS        | BTP-eC9          | 0.84  | 25.4  | 75.6  | 16.2  | 0.551 | 24        |
| P-PhS        | BTP-eC9          | 0.88  | 21.6  | 62.6  | 11.9  | 0.493 |           |
| SM-CA        | N3               | 0.838 | 24.33 | 75.62 | 15.41 | 0.528 | 25        |
| SM-CA-Reh    | N3               | 0.842 | 25.06 | 77.5  | 16.34 | 0.524 |           |
| SM-Reh       | N3               | 0.834 | 25.42 | 69.64 | 14.76 | 0.532 |           |
| MPhS-C2      | BTP-eC9          | 0.886 | 26.86 | 69.52 | 16.54 | 0.498 | 26        |
| MPhS-C2(DIO) | BTP-eC9          | 0.888 | 26.62 | 72.38 | 17.11 | 0.497 |           |
| MPhS-C4      | BTP-eC9          | 0.873 | 25.61 | 70.28 | 15.73 | 0.518 |           |
| MPhS-C6      | BTP-eC9          | 0.840 | 25.49 | 75.6  | 16.2  | 0.545 |           |
| BP-Cl        | BO-4Cl           | 0.8   | 18.47 | 46.36 | 6.85  | 0.597 | 27        |
| BM-Cl        | BO-4Cl           | 0.826 | 25.9  | 73.55 | 15.73 | 0.571 |           |
| ZR-C8        | Y6               | 0.829 | 25.0  | 58.8  | 12.2  | 0.558 | 28        |
| ZR-SiO       | Y6               | 0.852 | 26.0  | 72.3  | 16.0  | 0.537 |           |
| ZR-SiO-EH    | Y6               | 0.870 | 25.6  | 73.7  | 16.4  | 0.518 |           |
| BTR-Cl       | L8-BO            | 0.86  | 23.72 | 73.0  | 15.0  | 0.56  | 29        |
| TB           | L8-BO            | 0.86  | 24.67 | 74.2  | 17.0  | 0.56  |           |
| TB-F         | L8-BO            | 0.87  | 25.41 | 76.7  | 15.8  | 0.55  |           |
| SW1          | Y6               | 0.806 | 25.09 | 63.8  | 12.9  | 0.563 | 30        |
| SW2          | Y6               | 0.835 | 25.10 | 74.0  | 15.51 | 0.528 |           |
| BSFTR        | FO-EH-2Cl        | 0.876 | 22.39 | 80.44 | 15.78 | 0.639 | 31        |
| BSFTR        | FO-2Cl           | 0.885 | 22.01 | 78.41 | 15.27 | 0.638 |           |
| B1           | L8-BO            | 0.858 | 24.57 | 75.03 | 15.82 | 0.569 | 32        |
| B1           | BO-4Cl           | 0.822 | 25.51 | 73.61 | 15.46 | 0.541 |           |
| B1           | BO-4Cl:L8-BO     | 0.841 | 26.15 | 77.74 | 17.10 | 0.530 |           |
| Tz6T         | eC9-4F           | 0.860 | 25.75 | 67.2  | 14.9  | 0.549 | 33        |
| Tz6T         | eC9-4F           | 0.863 | 26.12 | 71.0  | 16.0  | 0.520 |           |
| BO-1         | BTP-eC9          | 0.845 | 25.56 | 77.74 | 16.79 | 0.543 | 34        |
| HD-1         | BTP-eC9          | 0.842 | 25.61 | 78.46 | 17.19 | 0.556 |           |
| OD-1         | BTP-eC9          | 0.828 | 24.97 | 71.89 | 15.18 | 0.559 |           |
| MPhS-C2      | BTP-eC9          | 0.891 | 26.45 | 72.82 | 17.16 | 0.505 | 35        |
| MPhS-C2      | SSe-NIC          | 0.876 | 26.29 | 73.08 | 16.83 | 0.499 |           |
| MPhS-C2      | BTP-eC9:SSe-NIC  | 0.880 | 26.85 | 76.27 | 18.02 | 0.496 |           |
| MPhS-C2      | L8-S9            | 0.875 | 25.69 | 70.72 | 15.90 | 0.543 |           |
| MPhS-C2      | L8-BO            | 0.894 | 25.37 | 73.14 | 16.59 | 0.538 | 36        |
| MPhS-C2      | L8-BO:L8-S9      | 0.884 | 26.43 | 77.46 | 18.10 | 0.536 |           |
| MPhS-C2      | Se-Giant         | 0.918 | 25.21 | 70.34 | 16.28 |       | This work |
| MPhS-C2      | BTP-eC9          | 0.892 | 26.16 | 73.66 | 17.19 |       |           |
| MPhS-C2      | BTP-eC9:Se-Giant | 0.903 | 26.34 | 76.33 | 18.16 |       |           |

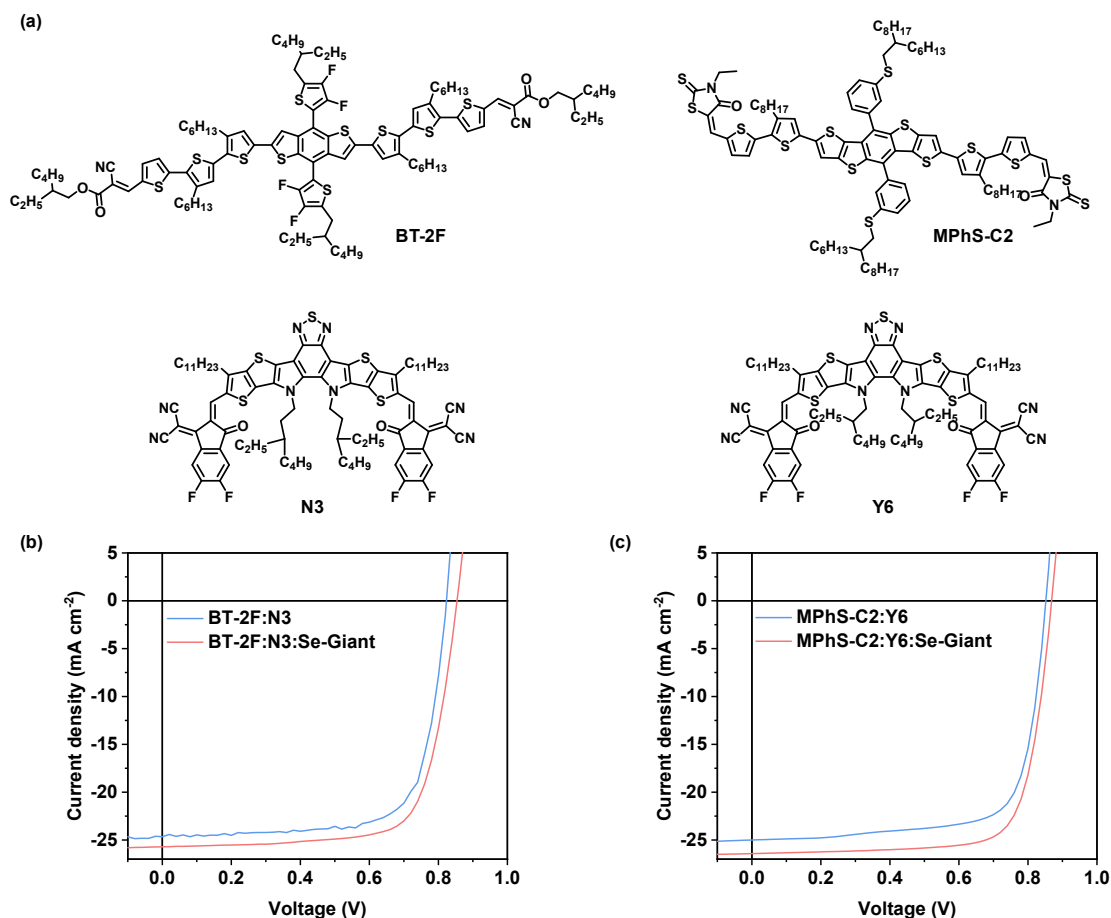

**Figure S11.** (a) Chemical structures of BT-2F, MPhS-C2, N3 and Y6. (b) The  $J$ - $V$  curves of the BT-2F:N3, BT-2F:N3:Se-Giant based devices measured under the illumination of AM 1.5G at 100 mW cm<sup>-2</sup>. (c) The  $J$ - $V$  curves of the MPhS-C2:Y6, MPhS-C2:Y6:Se-Giant based devices measured under the illumination of AM 1.5G at 100 mW cm<sup>-2</sup>.

**Table S6.** Photovoltaic parameters of the BT-2F:N3, BT-2F:N3:Se-giant based devices and the MPhS-C2:Y6, MPhS-C2:Y6:Se-giant based devices measured under the illumination of AM 1.5G at 100 mW cm<sup>-2</sup>.

| Active layer        | $V_{OC}$ (V) | $J_{SC}$ (mA cm <sup>-2</sup> ) | FF (%) | PCE <sup>a</sup> (%)  |
|---------------------|--------------|---------------------------------|--------|-----------------------|
| BT-2F:N3            | 0.824        | 24.66                           | 72.94  | 14.82<br>(14.60±0.20) |
| BT-2F:N3:Se-Giant   | 0.853        | 25.70                           | 73.35  | 16.08<br>(15.85±0.20) |
| MPhS-C2:Y6          | 0.852        | 25.00                           | 73.96  | 15.75<br>(15.70±0.10) |
| MPhS-C2:Y6:Se-Giant | 0.869        | 26.42                           | 75.96  | 17.44<br>(17.15±0.25) |

<sup>a</sup>The average PCE values with standard deviations obtained from ten devices.

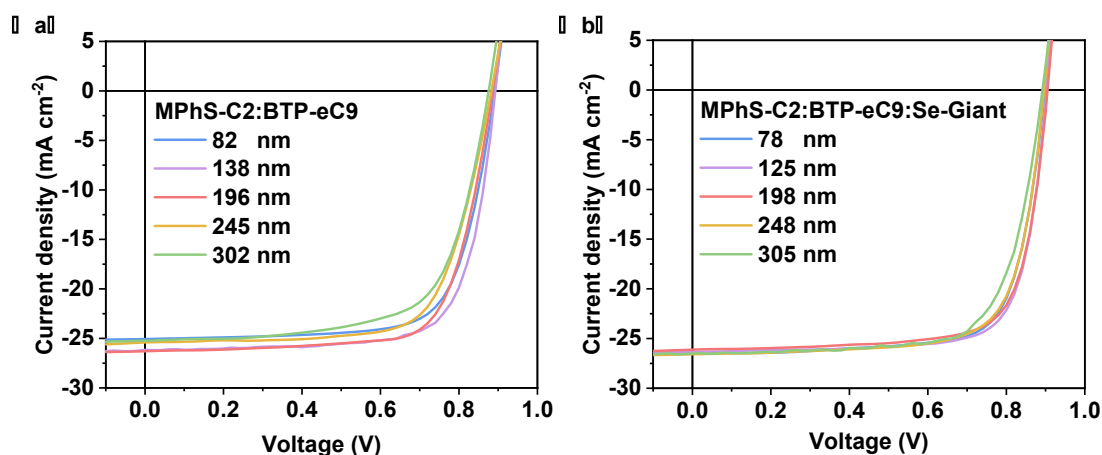

**Figure S12.**  $J$ - $V$  characteristics for devices based on (a) MPhS-C2:BTP-eC9 and (b) MPhS-C2:BTP-eC9:Se-Giant, with different active layer thicknesses, measured under the illumination of AM 1.5 G at  $100 \text{ mW cm}^{-2}$ .

**Table S7.** Summary of photovoltaic parameters of the all-SMOSCs based on MPhS-C2:BTP-eC9 and MPhS-C2:BTP-eC9:Se-Giant, with different active layer thicknesses, measured under the illumination of AM 1.5 G at  $100 \text{ mW cm}^{-2}$ .

| Systems                      | Thickness (nm) | $V_{OC}$ (V) | $J_{SC}$ ( $\text{mA/cm}^2$ ) | FF (%) | PCE <sup>a)</sup> (%) |
|------------------------------|----------------|--------------|-------------------------------|--------|-----------------------|
| MPhS-C2:BTP-eC9              | 82             | 0.891        | 25.06                         | 72.71  | 16.24<br>(16.10±0.10) |
|                              | 138            | 0.892        | 26.16                         | 73.66  | 17.19<br>(16.98±0.10) |
|                              | 196            | 0.886        | 26.30                         | 72.56  | 16.91<br>(16.65±0.20) |
|                              | 245            | 0.883        | 25.41                         | 70.71  | 15.87<br>(15.70±0.15) |
|                              | 302            | 0.876        | 25.24                         | 67.56  | 14.94<br>(14.80±0.12) |
| MPhS-C2:<br>BTP-eC9:Se-Giant | 78             | 0.899        | 26.47                         | 74.61  | 17.75<br>(17.60±0.10) |
|                              | 125            | 0.903        | 26.34                         | 76.33  | 18.16<br>(18.01±0.12) |
|                              | 198            | 0.905        | 26.15                         | 74.93  | 17.73<br>(17.55±0.15) |
|                              | 248            | 0.896        | 26.58                         | 73.59  | 17.53<br>(17.25±0.20) |
|                              | 305            | 0.892        | 26.50                         | 71.96  | 17.01<br>(16.90±0.05) |

<sup>a)</sup>The average PCE values with standard deviations were obtained from 10 independent cells.

**Table S8.** Summary of thickness, PCE and the corresponding photovoltaic parameters of all-SMOSCs

| Systems                        | Thickness (nm) | $V_{oc}$ (V) | $J_{sc}$ (mA/cm <sup>2</sup> ) | FF (%) | PCE (%)               | Reference |
|--------------------------------|----------------|--------------|--------------------------------|--------|-----------------------|-----------|
| DR3TSBDT:PC <sub>71</sub> BM   | 280            | 0.88         | 15.82                          | 65.3   | 9.05                  | 37        |
| BTR:PC <sub>71</sub> BM        | 310            | 0.94         | 14.5                           | 70     | 9.5                   | 38        |
| BTR:NITI:PC <sub>71</sub> BM   | 300            | 0.94         | 19.5                           | 73.83  | 13.63                 | 39        |
| BTR:BTR-OH:PC <sub>71</sub> BM | 300            | 0.93         | 14.62                          | 74.2   | 10.14                 | 40        |
| SM1-F:Y6                       | 250            | 0.85         | 21.9                           | 64     | 11.9                  | 17        |
| L2:Y6                          | 300            | 0.82         | 24.5                           | 71.2   | 14.3                  | 41        |
| L1:Y6                          | 300            | 0.81         | 24.31                          | 70.5   | 13.8                  |           |
| HD1:BTP-eC9                    | 350            | 0.811        | 27.25                          | 67.52  | 14.92                 | 34        |
| T27:Y6                         | 300            | 0.812        | 27.21                          | 68.02  | 15.03                 | 42        |
| DRTB-T-C4:IT-4F                | 300            | 0.893        | 18.68                          | 61.0   | 10.18                 | 43        |
| BTR:PC <sub>71</sub> BM        | 250            | 0.9          | 13.9                           | 74     | 9.3                   | 44        |
| DRTT-6Se:N3                    | 300            | 0.85         | 25.29                          | 69.9   | 15.03                 |           |
| DRTT-T:N3                      | 300            | 0.85         | 22.00                          | 58.6   | 10.89                 | 45        |
| DRTT-2Se:N3                    | 300            | 0.85         | 23.33                          | 66.9   | 13.20                 |           |
| DRTT-6Se:N3                    | 300            | 0.84         | 25.33                          | 64.3   | 13.81                 |           |
| C2: PC <sub>71</sub> BM        | 300            | 0.97         | 10.62                          | 56     | 5.80                  | 46        |
| C4: PC <sub>71</sub> BM        | 300            | 0.97         | 11.43                          | 64     | 7.17                  |           |
| NDTP-CNCOO:                    | 302            | 0.94         | 10.77                          | 71.1   | 7.20                  |           |
| PC <sub>71</sub> BM            | 356            | 0.94         | 10.49                          | 68.0   | 6.70                  | 47        |
|                                | 413            | 0.93         | 10.37                          | 64.7   | 6.24                  |           |
| MPhS-C2:BTP-eC9:Se-Giant       | 305            | 0.892        | 26.5                           | 71.96  | 17.01<br>(16.90±0.05) | This work |

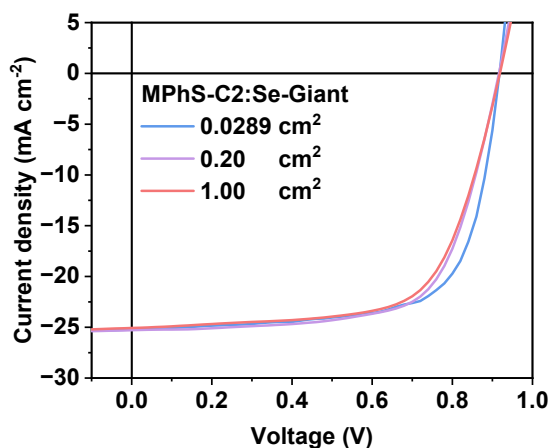

**Figure S13.**  $J$ - $V$  characteristics for devices based on MPhS-C2: Se-Giant, with different active layer areas measured under the illumination of AM 1.5 G at  $100 \text{ mW cm}^{-2}$ .

**Table S9.** Summary of photovoltaic parameters of the all-SMOSCs based on MPhS-C2:BTP-eC9 with different active layer area, measured under the illumination of AM 1.5 G at  $100 \text{ mW cm}^{-2}$ .

| Area ( $\text{cm}^2$ ) | $V_{\text{OC}}$ (V) | $J_{\text{SC}}$ ( $\text{mA}/\text{cm}^2$ ) | FF (%) | PCE <sup>a)</sup> (%) |
|------------------------|---------------------|---------------------------------------------|--------|-----------------------|
| 0.0289                 | 0.918               | 25.21                                       | 70.34  | 16.28<br>(16.02±0.12) |
| 0.20                   | 0.916               | 25.28                                       | 68.29  | 15.82<br>(15.52±0.20) |
| 1.00                   | 0.918               | 25.07                                       | 66.72  | 15.35<br>(14.90±0.22) |

<sup>a)</sup>The average PCE values with standard deviations were obtained from 10 independent cells.

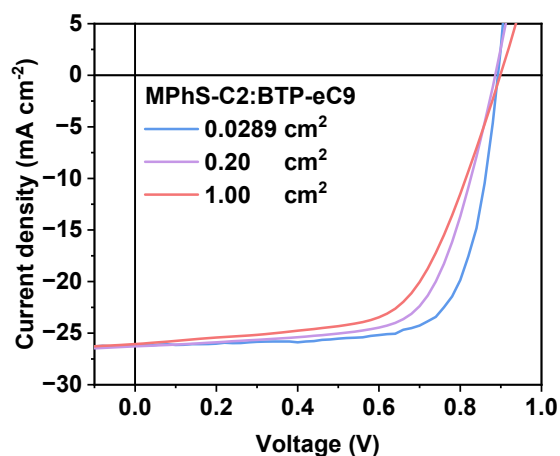

**Figure S14.**  $J$ - $V$  characteristics for devices based on MPhS-C2:BTP-eC9, with different active layer areas measured under the illumination of AM 1.5 G at  $100 \text{ mW cm}^{-2}$ .

**Table S10.** Summary of photovoltaic parameters of the all-SMOSCs based on MPhS-C2:BTP-eC9 with different active layer area, measured under the illumination of AM 1.5 G at  $100 \text{ mW cm}^{-2}$ .

| Area ( $\text{cm}^2$ ) | $V_{\text{OC}}$ (V) | $J_{\text{SC}}$ ( $\text{mA}/\text{cm}^2$ ) | FF (%) | PCE <sup>a)</sup> (%) |
|------------------------|---------------------|---------------------------------------------|--------|-----------------------|
| 0.0289                 | 0.892               | 26.16                                       | 73.66  | 17.19<br>(16.98±0.10) |
| 0.20                   | 0.887               | 26.27                                       | 67.53  | 15.73<br>(15.45±0.15) |
| 1.00                   | 0.898               | 26.06                                       | 61.53  | 14.40<br>(14.22±0.12) |

<sup>a)</sup>The average PCE values with standard deviations were obtained from 10 independent cells.

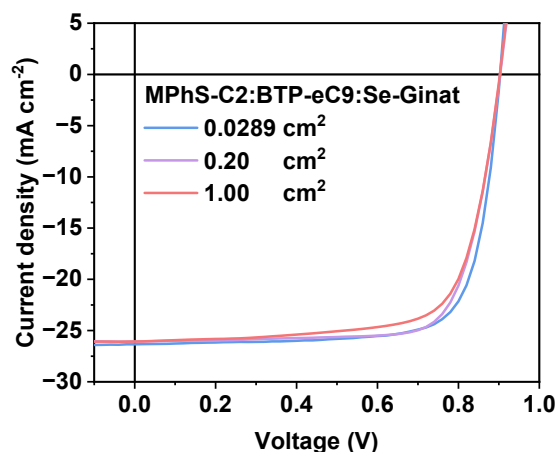

**Figure S15.**  $J$ - $V$  characteristics for devices based on MPhS-C2:BTP-eC9:Se-Ginat, with different active layer areas measured under the illumination of AM 1.5 G at  $100 \text{ mW cm}^{-2}$ .

**Table S11.** Summary of photovoltaic parameters of the all-SMOSCs based on MPhS-C2:BTP-eC9:Se-Ginat with different active layer areas, measured under the illumination of AM 1.5 G at  $100 \text{ mW cm}^{-2}$ .

| Area ( $\text{cm}^2$ ) | $V_{\text{oc}}$ (V) | $J_{\text{sc}}$ ( $\text{mA/cm}^2$ ) | FF (%) | PCE <sup>a)</sup> (%) |
|------------------------|---------------------|--------------------------------------|--------|-----------------------|
| 0.0289                 | 0.903               | 26.34                                | 76.33  | 18.16<br>(18.01±0.12) |
| 0.20                   | 0.903               | 26.08                                | 75.53  | 17.78<br>(17.40±0.12) |
| 1.00                   | 0.902               | 26.07                                | 72.82  | 17.12<br>(17.00±0.08) |

<sup>a)</sup>The average PCE values with standard deviations were obtained from 10 independent cells.



**Table S12.** The corresponding  $T_{80}$  lifetime of different kinds of OSCs reported in literature.

| Active Layer | Systems                    | PCE (%) | Lifetime (h) | Reference |    |
|--------------|----------------------------|---------|--------------|-----------|----|
| All-SMOSCs   | MPhS-C2:BTP-eC9:Se-Giant   | 18.16   | 3000         | This work |    |
|              | MPhS-C2:BTP-eC9            | 17.19   | 80           |           |    |
|              | MPhS-C2:Se-Giant           | 16.28   | 2800         |           |    |
|              | MPhS-C2:BTP-eC9:SSe-NIC    | 18.02   | 436          | 35        |    |
|              | MPhS-C2:BTP-eC9            | 17.16   | 76           |           |    |
|              | MPhS-C2:SSe-NIC            | 16.83   | 62           | 48        |    |
|              | BTR-Cl:Y6                  | 13.31   | 8            |           |    |
|              | BTR-Cl:Y6                  | 13.88   | 15           |           |    |
|              | B1:Y6                      | 12.32   | 9            |           |    |
|              | B1:Y6                      | 12.76   | 16           |           |    |
|              | B1:BTP-eC9                 | 14.86   | 14           |           |    |
|              | B1:BTP-eC9                 | 13.92   | 7            |           |    |
|              | BTR-F:M36                  | 10.14   | 0.38         |           | 49 |
|              | BTR-F:M36:N2200            | 12.19   | 0.66         |           |    |
|              | DRCN5T:PC <sub>71</sub> BM | 6.73    | 1375.6       |           | 50 |
|              | DRCN5T:PC <sub>71</sub> BM | 8.87    | 870          |           |    |
|              | DRCN5T:PC <sub>71</sub> BM | 6.64    | 192          |           |    |
|              | BTR:PC <sub>71</sub> BM    | 9.81    | 78           | 51        |    |
|              | BTR:PC <sub>71</sub> BM    | 10.14   | 50           |           |    |
|              | BTR:PC <sub>71</sub> BM    | 9.16    | 15           |           |    |
|              | BTR:PC <sub>71</sub> BM    | 7.12    | 8            |           |    |
|              | BTR:PC <sub>71</sub> BM    | 6.59    | 65           |           |    |
|              | SM-BDT:Y8                  | 10.68   | 96           |           | 52 |
|              | SM-DTBDT:Y8                | 12.45   | 756          |           |    |
|              | X2:PC <sub>61</sub> BM     | 6.3     | 88           | 53        |    |
|              | F3:PC <sub>61</sub> BM     | 7.3     | 82           |           |    |
|              | DRCN7T:PC <sub>71</sub> BM | 9.1     | 86           |           |    |
|              | MPhS-C2:L8-BO              | 16.59   | 124          | 36        |    |
|              | MPhS-C2:L8-S9              | 15.9    | 595          |           |    |
|              | MPhS-C2:L8-BO:L8-S9        | 18.1    | 993          |           |    |

**Operational stability measurements:** The devices were fabricated without further encapsulation. We measured light-induced degradation experiments with one sun equivalent illumination intensity for 800 hours. The devices were put inside a nitrogen filled glovebox ( $\text{H}_2\text{O} < 1 \text{ ppm}$ ,  $\text{O}_2 < 1 \text{ ppm}$ ) and continuously illuminated with a white LED array (XLamp CXA1512 6500K CCT). The illumination light intensity was initially set before testing to make sure the output short-circuit current density equals the value that was measured under standard conditions mentioned earlier, and it monitored by a photodiode (Hamamatsu S1336-8BQ) to guarantee stable light intensity.  $J$ - $V$  characters of the devices were checked periodically, and the photovoltaic parameters were calculated automatically according to the achieved  $J$ - $V$  curves. Notably, the photovoltaic parameters of devices under illumination were recorded overtime and the degradation curves were shown.

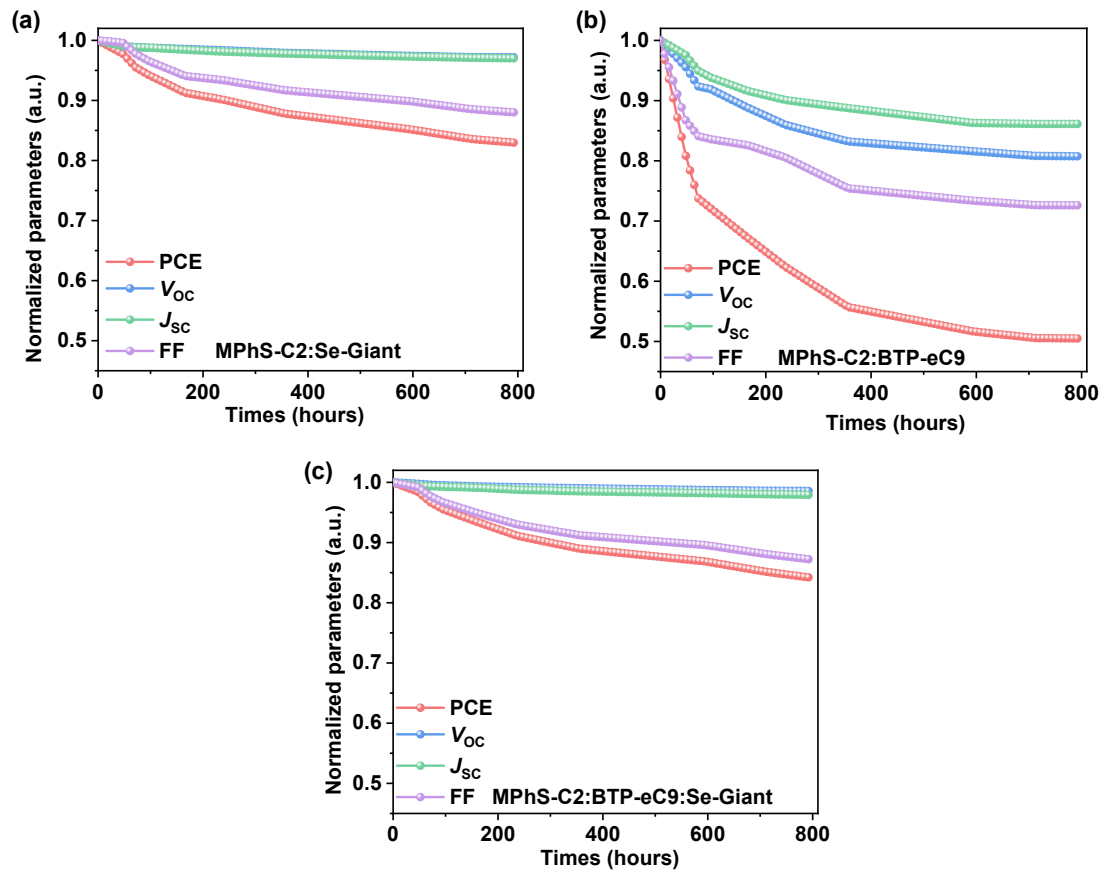

**Figure S16.** The normalized degradation trends of relevant photovoltaic parameters including PCE, FF,  $J_{sc}$  and  $V_{oc}$  under continuous light-soaking for (a) MPhS-C2:Se-Giant, (b) MPhS-C2:BTP-eC9 and (c) MPhS-C2:BTP-eC9:Se-Giant.

**Thermal stability testing:** The testing devices were fabricated under the same preparation conditions, as mentioned above. After the spin-coating of the active layer deposited on the ITO/PEDOT:PSS films, the samples were transferred to a hot plate at 100 °C in a N<sub>2</sub>-filled glovebox and annealed for various time periods. Then, the samples were quenched to room temperature before the cathode layers were thermally deposited. All the samples for time-dependent annealing measurements were prepared under the same conditions with the thermal stability testing ones.

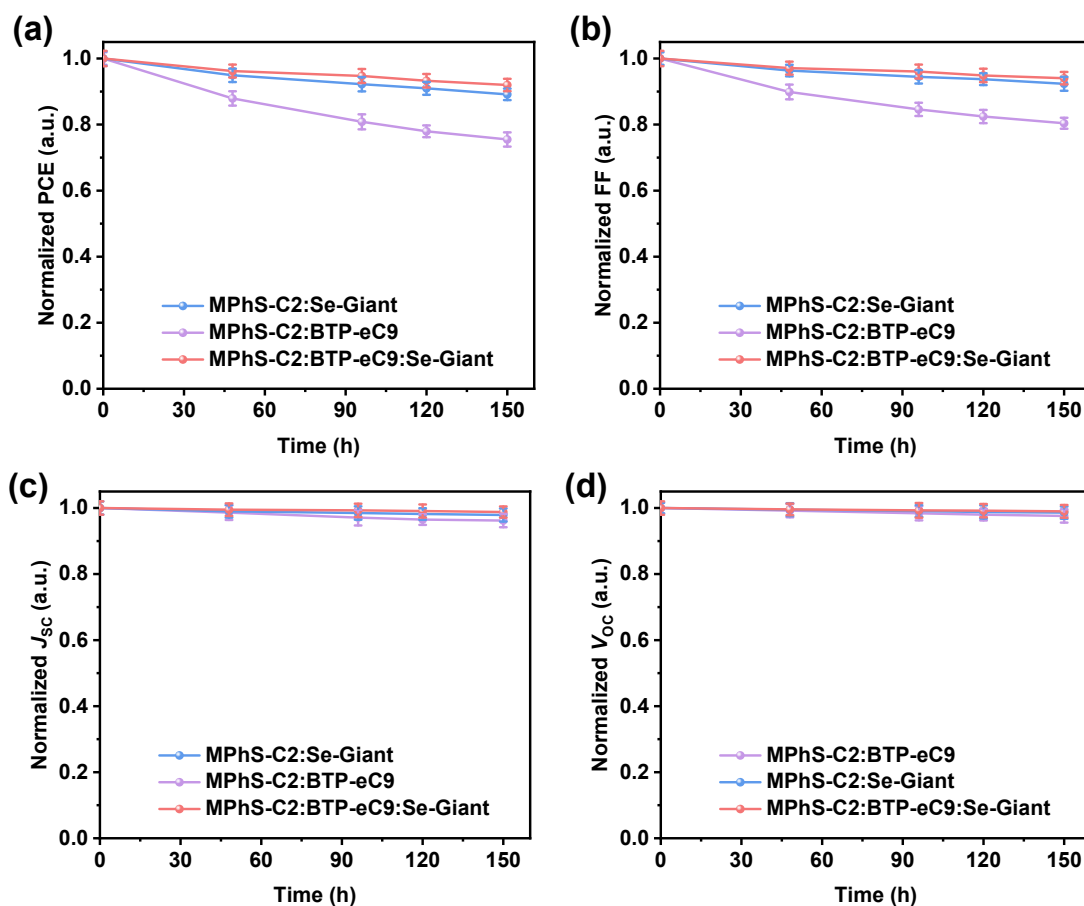

**Figure S17.** The normalized degradation trends of relevant photovoltaic parameters of the MPhS-C2:Se-Giant, MPhS-C2:BTP-eC9, MPhS-C2:BTP-eC9:Se-Giant including (a) PCE, (b) FF, (c)  $J_{sc}$ , (d)  $V_{oc}$ , under continuous thermal annealing.

**Diffusion ordered spectroscopy (DOSY):** The Bruker AVANCE (600 MHz) was applied to obtain diffusion ordered spectroscopy (DOSY) in solution. The experiment was conducted at room temperature, for which the concentration is 12 mg/mL for BTP-eC9 and 15 mg/mL for BTP-eC9:Se-Giant (0.8:0.2, wt%). The diffusion coefficient was calculated by Stokes-Einstein equation:

$$D = \frac{kT}{6\pi\eta r_s}$$

Where D is diffusion coefficient, k is Boltzmann constant, T is temperature,  $\eta$  is viscosity of solvent and  $r_s$  is the thermodynamic radius of the molecule. Generally, larger D indicates stronger molecular diffusion.

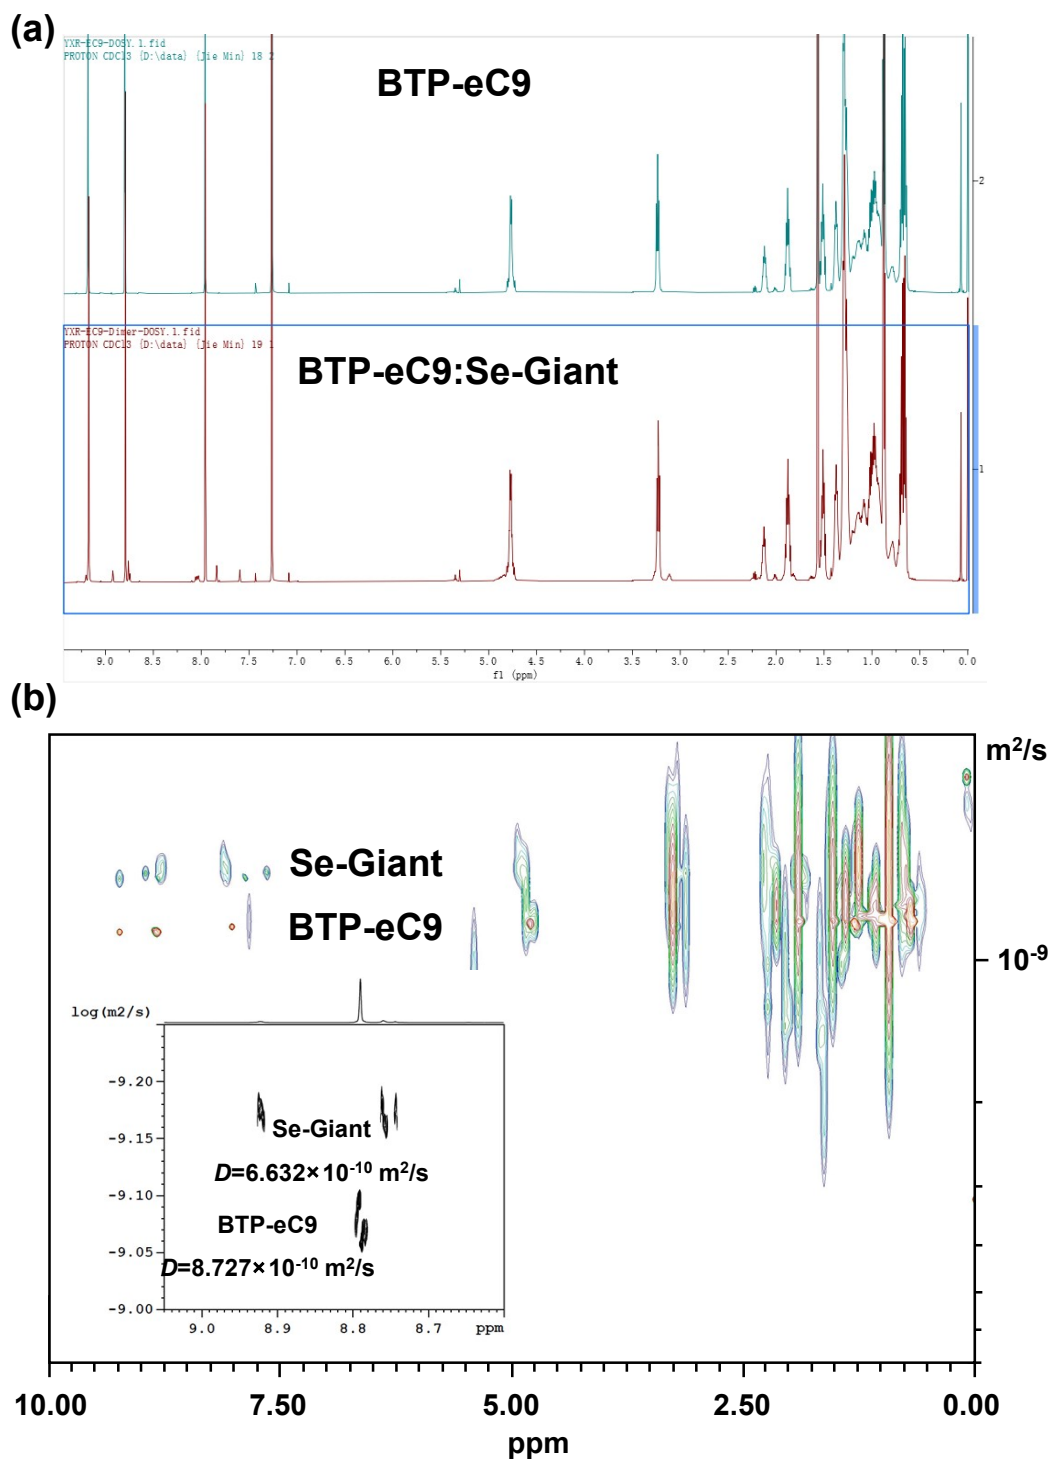

**Figure S18.** (a)  $^1\text{H}$  NMR spectra of BTP-eC9 and BTP-eC9:Se-Giant in  $\text{CDCl}_3$  solution. (b)  $^1\text{H}$  DOSY spectra of BTP-eC9:Se-Giant in  $\text{CDCl}_3$  solution.

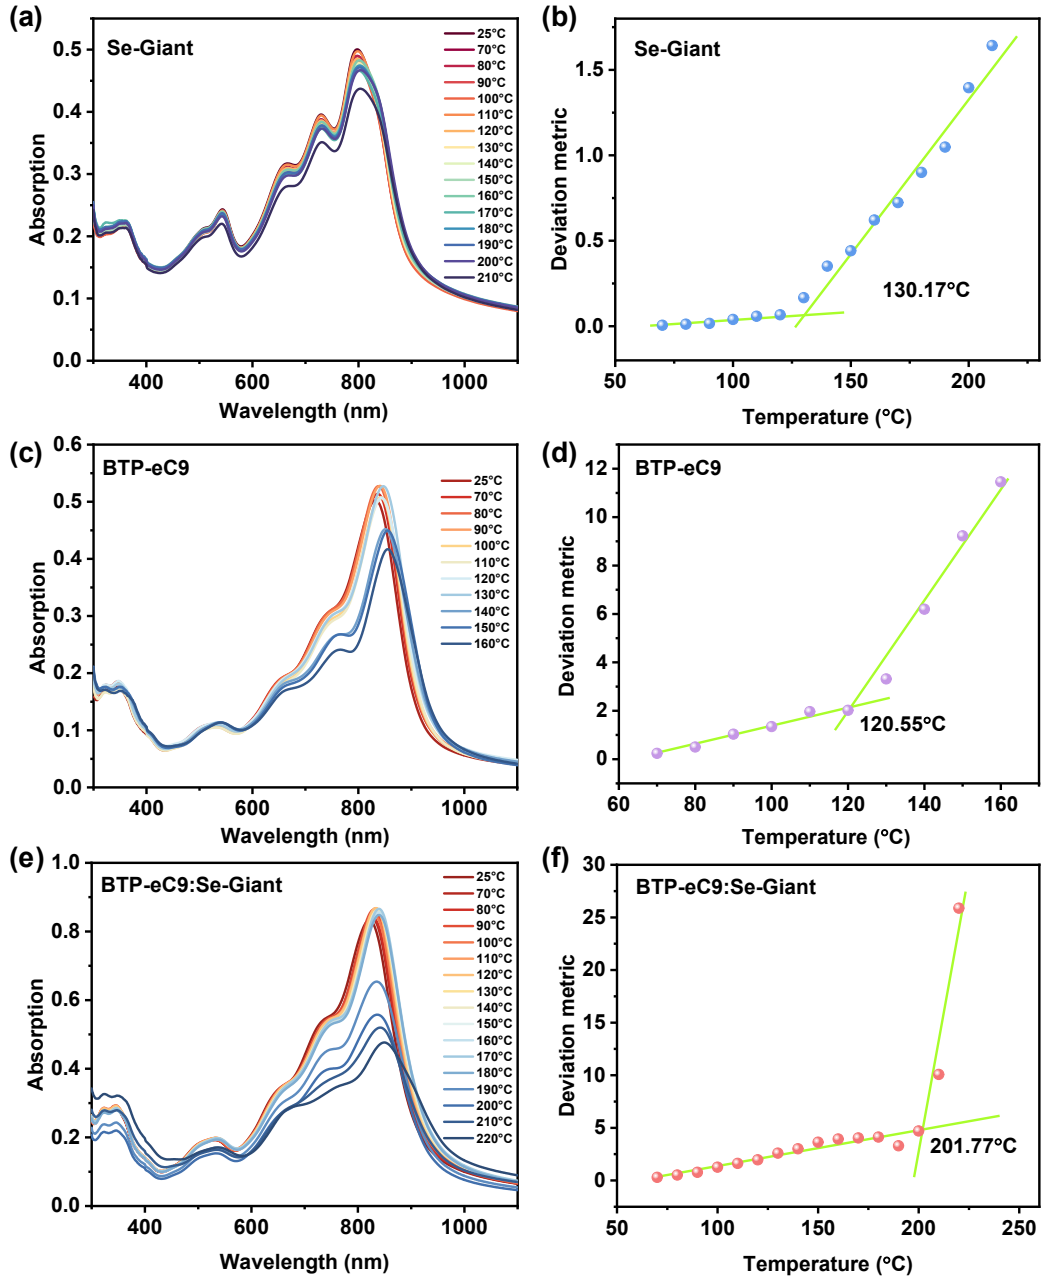

**Figure S19.** *UV-vis-NIR* absorption spectra of (a) Se-Giant, (c) BTP-eC9 and (e) BTP-eC9:Se-Giant. Evolution of the deviation Metric ( $DM_T$ ) as a function of annealing temperature, illustrating a glass transition of (b) Se-Giant (130.17 °C), (d) BTP-eC9 (120.55 °C) and (f) BTP-eC9:Se-Giant (201.77 °C). Notably, the  $DM_T$  factor represents the sum of squared deviations in absorbance between un-annealed and annealed

films:<sup>54, 55</sup>

$$DM_T = \sum_{\lambda_{min}}^{\lambda_{max}} [(I_{RT}(\lambda) - I_T(\lambda))]^2$$

, where  $\lambda$ ,  $\lambda_{min}$  and  $\lambda_{max}$  are explained as the wavelength, the lower and upper bounds of the optical sweep,  $I_{RT}(\lambda)$  and  $I_T(\lambda)$  are explained as the normalized absorption intensities of un-annealed and annealed films, respectively. When the overall absorption intensity changes significantly, it suggests

that the inherent properties of the material have undergone a glass transition, and the corresponding temperature is  $T_g$ .

**Transient absorption spectroscopy (TAS):** For femtosecond transient absorption spectroscopy, the fundamental output from Yb:KGW laser (1030 nm, 220 fs Gaussian fit, 100 kHz, Light Conversion Ltd) was separated into two light beams. One was introduced to NOPA (ORPHEUS-N, Light Conversion Ltd) to produce a certain wavelength for the pump beam (here we use 825 nm), and the other was focused onto a YAG plate to generate a white light continuum as a probe beam. The pump and probe overlapped on the sample at a small angle of less than  $10^\circ$ . The transmitted probe light from the sample was collected by a linear CCD array. Then we obtained transient differential, transmission signals by the equation shown below:

$$\frac{\Delta T}{T} = \frac{T_{pump-on} - T_{pump-off}}{T_{pump-off}}$$

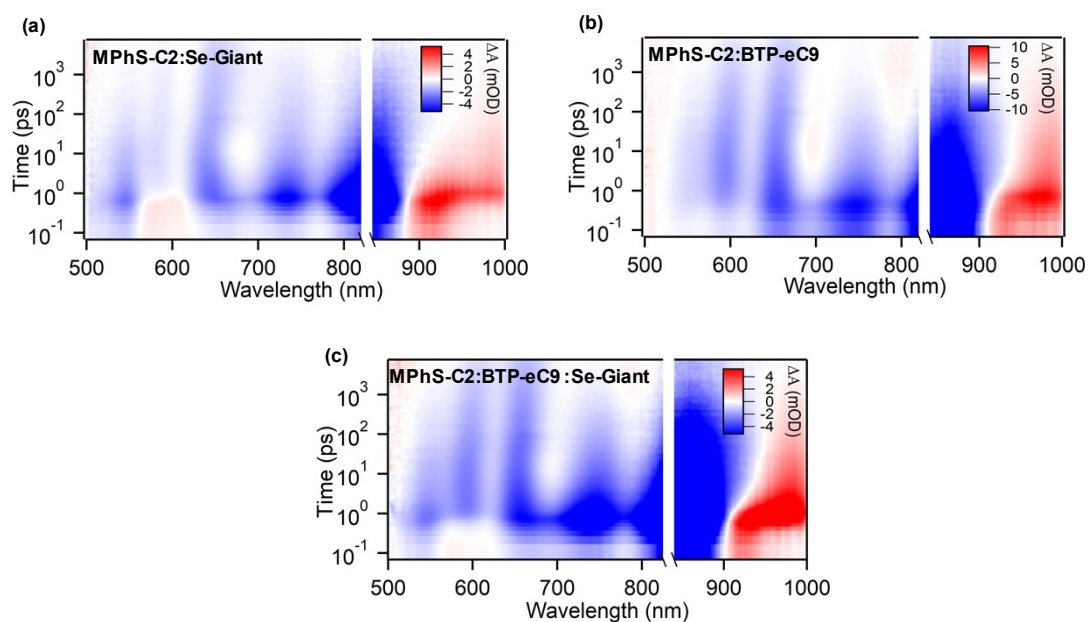

**Figure S20.** The TA images of a) MPhS-C2:Se-Giant film, b) MPhS-C2:BTP-eC9 film, and c) MPhS-C2:BTP-eC9:Se-Giant film under 825 nm pump.

**Table S13.** Parameters constants of A1,  $\tau_1$ , and A2  $\tau_2$  of different blends.

| Systems          | A1   | $\tau_1$ (ps) | A2   | $\tau_2$ (ps) | Average $\tau_h$ (ps) |
|------------------|------|---------------|------|---------------|-----------------------|
| MPhS-C2:Se-Giant | 55.2 | 0.58          | 44.8 | 10.88         | 5.19                  |
| MPhS-C2:BTP-eC9  | 53.1 | 0.46          | 46.9 | 10.40         | 5.12                  |

**Transient photocurrent (TPC) measurements:** Relevant control and MSM solar cells were excited with a 405 nm laser diode. The transient photocurrent response of the devices at a short circuit condition to a 200  $\mu$ s square pulse from the LED with no background illumination. The current traces were recorded on a Tektronix DPO3034 digital oscilloscope by measuring the voltage drop over a 5-ohm sensor resistor in series with the solar cell. DC voltage was applied to the solar cell with an MRF544 bipolar junction transistor in a common collector amplifier configuration.

**Transient photovoltage (TPV) measurements:** In the TPV measurements, a 405 nm laser diode was used to keep the organic solar cells in the  $V_{OC}$  conditions. Measuring the light intensity with a highly linear photodiode and driving the laser intensity with a waveform generator (Agilent 33500B). Moreover, a small perturbation was induced with a second 405 nm laser diode. The intensity of the short laser pulse was adjusted to keep the voltage perturbation below 10 mV. After the pulse, the voltage decays back to its steady state value in a single exponential decay.

**Table S14.** The exciton generation, charge collection, charge recombination and charge extraction lifetime of the binary and ternary devices.

| Systems                   | $\eta_{diss}^a$<br>(%) | $\eta_{coll}^b$<br>(%) | $\alpha^c$ | $n$ ( $kT/q$ ) <sup>d</sup> | $\tau_{TPC}^e$ | $\tau_{TPV}^f$ |
|---------------------------|------------------------|------------------------|------------|-----------------------------|----------------|----------------|
| MPhS-C2:Se-Giant          | 96.20                  | 80.50                  | 0.993      | 1.25                        | 3.2            | 1.89           |
| MPhS-C2: BTP-eC9          | 96.52                  | 83.22                  | 0.991      | 1.41                        | 2.7            | 4.23           |
| MPhS-C2: BTP-eC9:Se-Giant | 98.08                  | 87.58                  | 0.996      | 1.18                        | 1.1            | 6.76           |

<sup>a</sup>)Under short circuit condition. <sup>b</sup>)Under the maximal power output condition. <sup>c</sup>) $J_{sc} \propto P_{in}^\alpha$ .  
<sup>d</sup>) $V_{oc} \propto (nkT/q)\ln P_{in}$ . <sup>e</sup>)The extraction time extract from TPC. <sup>f</sup>)The extracted carrier lifetimes extract from TPV.



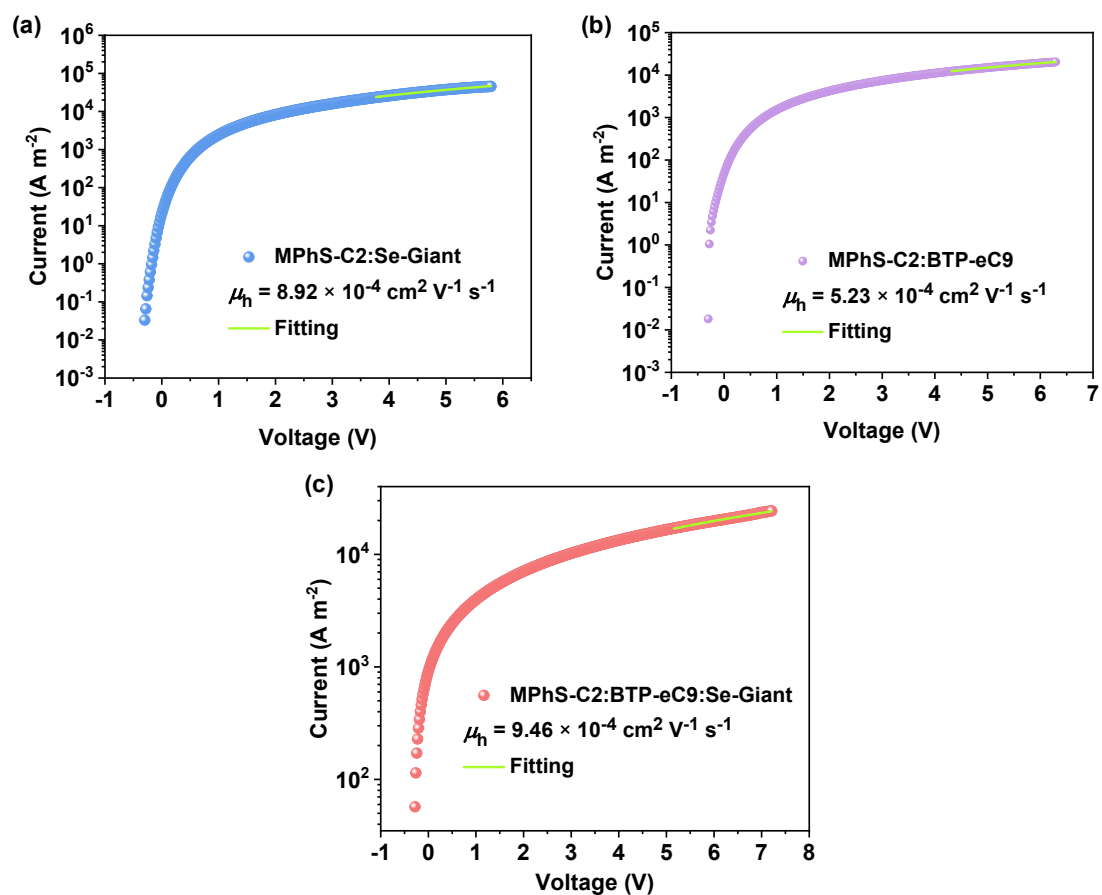

**Figure S21.** The dark  $J$ - $V$  characteristics of the (a) MPhS-C2:Se-Giant, (b) MPhS-C2:BTP-eC9 and (c) MPhS-C2: BTP-eC9:Se-Giant based hole-only devices. The green lines represent the best fitting using the SCLC model.

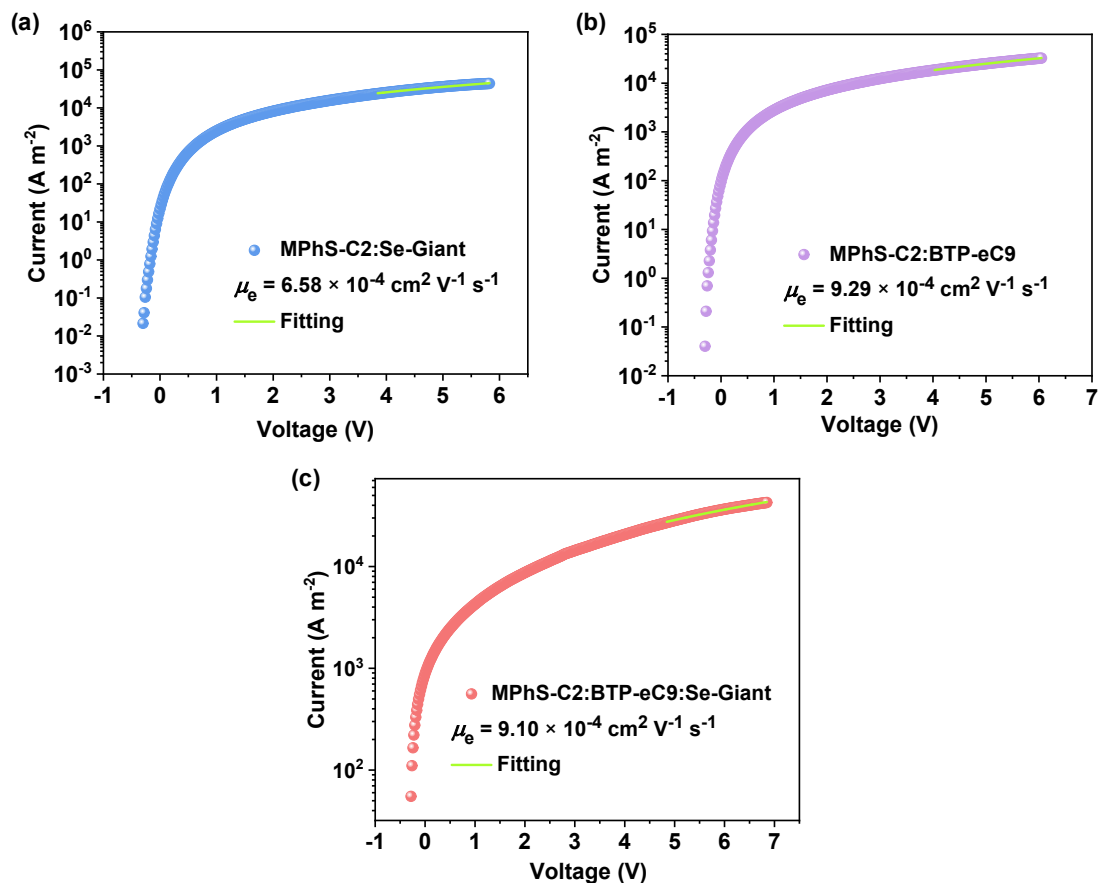

**Figure S22.** The dark  $J$ - $V$  characteristics of the (a) MPhS-C2:Se-Giant, (b) MPhS-C2:BTP-eC9 and (c) MPhS-C2: BTP-eC9:Se-Giant based electron-only devices. The green lines represent the best fitting using the SCLC model.

**Table S15.** Investigations of the hole and electron mobilities and corresponding  $\mu_h/\mu_e$  ratios of the relevant devices extracted from the SCLC measurements and device mobilities.

| Systems                   | Hole mobility<br>( $\times 10^{-4} \text{ cm}^2 \text{ V}^{-1} \text{ s}^{-1}$ ) | Electron mobility<br>( $\times 10^{-4} \text{ cm}^2 \text{ V}^{-1} \text{ s}^{-1}$ ) | $\mu_h/\mu_e$ |
|---------------------------|----------------------------------------------------------------------------------|--------------------------------------------------------------------------------------|---------------|
| MPhS-C2:Se-Giant          | 8.92                                                                             | 6.58                                                                                 | 1.35          |
| MPhS-C2:BTP-eC9           | 5.23                                                                             | 9.29                                                                                 | 0.66          |
| MPhS-C2: BTP-eC9:Se-Giant | 9.46                                                                             | 9.10                                                                                 | 0.86          |

***FTPS-EQE spectra measurements:*** FTPS-EQE measurement was performed at a Vertex 70 from Bruker Optics, which is equipped with a quartz tungsten halogen lamp, quartz beam-splitter, and external detector option. The amplification of the photocurrent product was achieved by using a low-noise current amplifier (SR570) on the illumination of the photovoltaic devices with light modulated by the Fourier transform infrared spectroscopy (FTIR). The external detector port of the FTIR gathered the signals from the current amplifier for output voltage. A Keithley 2400 Source Meter was used for supplying voltages and recording injected current, and a Keithley 485 picoammeter was used for measuring the emitted light intensity.

***Electroluminescence (EL) measurement:*** The EL signature was collected with a monochromator and detected with an InGaAs detector. The data collection range is 700-1300 nm.

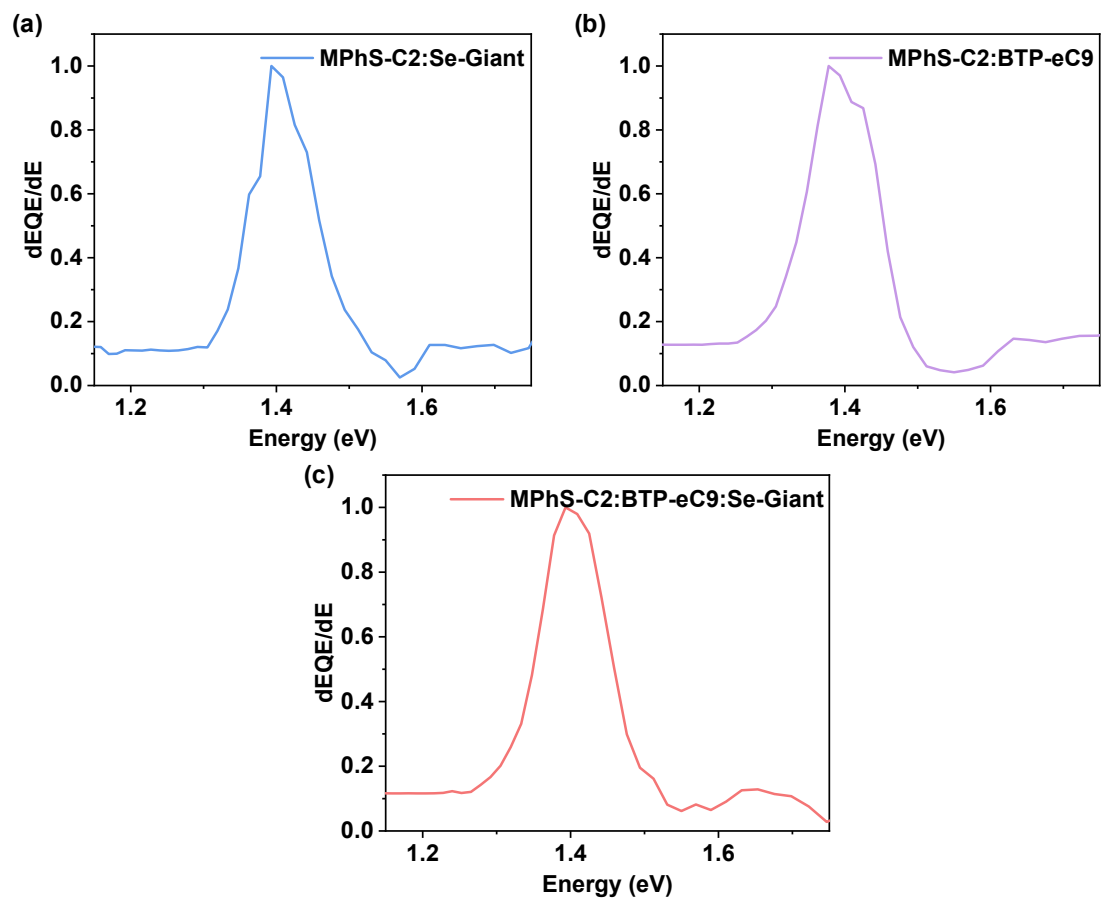

**Figure S23.** Bandgap distributions for all-SMOSCs based on (a) MPhS-C2:Se-Giant, (b) MPhS-C2:BTP-eC9, and (c) MPhS-C2:BTP-eC9:Se-Giant blends. The  $E_g$  value is determined by the derivatives of the FTPS-EQE curve and then calculated according to the literature<sup>36</sup>.

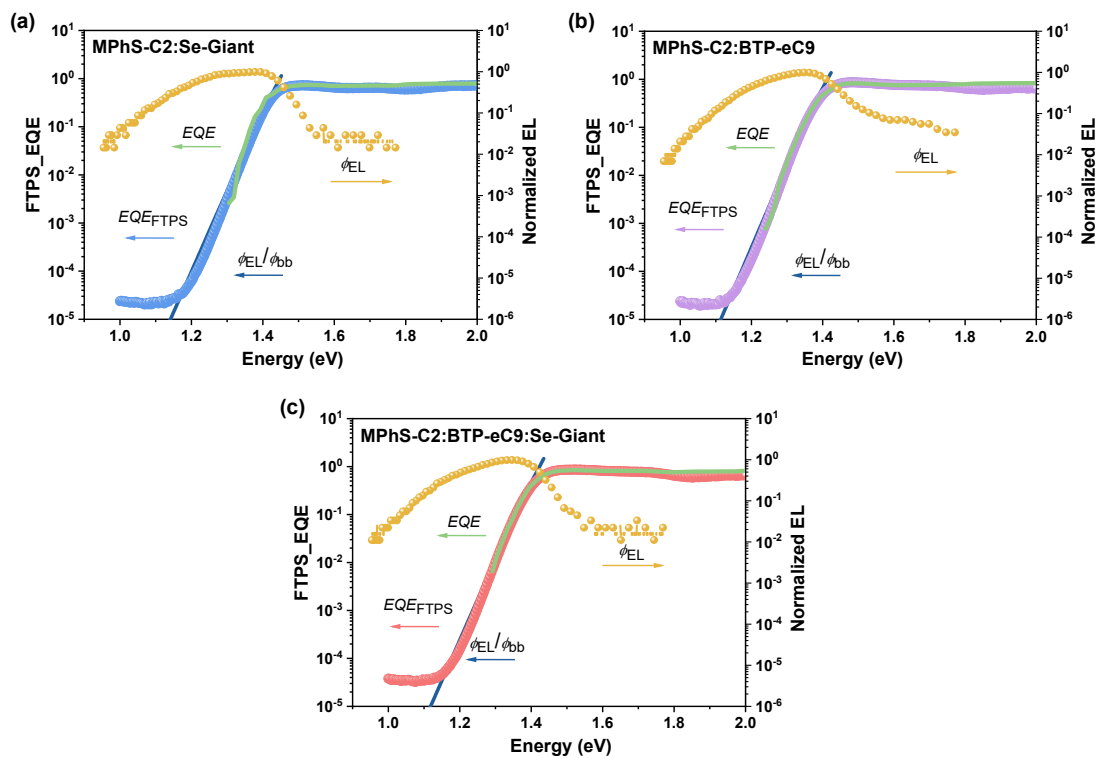

**Figure S24.** Semilogarithmic plots of normalized EL spectra, measured EQE spectra, and FTPS-EQE spectra as a function of energy for devices based on (a) MPhS-C2:Se-Giant, (b) MPhS-C2:BTP-eC9, and (c) MPhS-C2:BTP-eC9:Se-Giant blends.

**EQE-EL Measurement:** Electroluminescence (EL) quantum efficiency (EQEEL) measurements were performed by applying external voltage sources through the devices from 1V to 3V. A Keithley 2400 Source Meter was used for supplying voltages and recording injected current, and a Keithley 485 picoammeter was used for measuring the emitted light intensity.

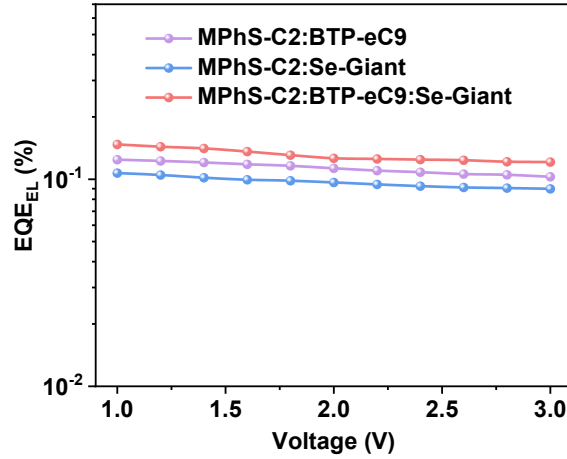

**Figure S25.** The EQE<sub>EL</sub> of the binary and ternary devices at different injected voltages.

**Table S16.** Measured and calculated parameters to quantify the non-radiative recombination losses of the binary and ternary devices.

| Systems                  | $E_g^a$<br>(eV) | $V_{oc}^b$<br>(V) | $E_{loss}$<br>(eV) | $V_{SQ\ oc}$<br>(V) | $\Delta E_1$<br>(eV) | $V_{oc}^{rad\ c}$<br>(V) | $\Delta E_2$<br>(eV) | $\Delta E_3$<br>(eV) | EQE <sub>EL</sub> <sup>d</sup><br>(%) | $Exp.\Delta E_{3e}$<br>(eV) |
|--------------------------|-----------------|-------------------|--------------------|---------------------|----------------------|--------------------------|----------------------|----------------------|---------------------------------------|-----------------------------|
| MPhS-C2:Se-Giant         | 1.408           | 0.918             | 0.490              | 1.147               | 0.261                | 1.091                    | 0.056                | 0.173                | 0.097                                 | 0.179                       |
| MPhS-C2:BTP-eC9          | 1.396           | 0.893             | 0.503              | 1.142               | 0.254                | 1.061                    | 0.081                | 0.168                | 0.113                                 | 0.175                       |
| MPhS-C2:BTP-eC9:Se-Giant | 1.402           | 0.903             | 0.499              | 1.146               | 0.256                | 1.067                    | 0.078                | 0.165                | 0.131                                 | 0.170                       |

<sup>a)</sup> $E_{gap}$  was determined from the curve of the  $dEQE/dE$ . <sup>b)</sup> $V_{oc}$  was calculated from the measured  $J$ - $V$  curves. <sup>c)</sup> $V_{oc}^{rad}$  was calculated from FTPS and EL measurements. <sup>d)</sup>EQE<sub>EL</sub> is the EL quantum efficiency of the fabricated devices; <sup>e)</sup>Exp. $\Delta E_3$  is calculated with the Equation ( $\Delta E_3 = -kT \ln(EQE_{EL})$ ).

**Atomic force microscopy (AFM) measurements:** AFM measurements were performed by using a Nano Wizard 4 atomic force microscopy (JPK Inc. Germany) in Qi mode to observe the surface morphologies of the ITO/PEDOT:PSS/active layer.

**Table S17.** Investigations of the morphology parameters extracted from the GIWAXS measurements of MPhS-C2:Se-Giant, MPhS-C2:BTP-eC9 and MPhS-C2:BTP-eC9:Se-Giant blends.

| Systems                  | In plane                     |                         |                               |                         | Out of plane                 |                         |                               |                         |
|--------------------------|------------------------------|-------------------------|-------------------------------|-------------------------|------------------------------|-------------------------|-------------------------------|-------------------------|
|                          | Lamellar stacking (100)      |                         |                               |                         | $\pi$ - $\pi$ stacking (010) |                         |                               |                         |
|                          | $q$<br>( $\text{\AA}^{-1}$ ) | $d$<br>( $\text{\AA}$ ) | FWHM<br>( $\text{\AA}^{-1}$ ) | CCL<br>( $\text{\AA}$ ) | $q$<br>( $\text{\AA}^{-1}$ ) | $d$<br>( $\text{\AA}$ ) | FWHM<br>( $\text{\AA}^{-1}$ ) | CCL<br>( $\text{\AA}$ ) |
| MPhS-C2:Se-Giant         | 0.27                         | 23.71                   | 0.062                         | 101.34                  | 1.79                         | 3.50                    | 0.33                          | 18.92                   |
| MPhS-C2:BTP-eC9          | 0.26                         | 24.17                   | 0.060                         | 104.72                  | 1.83                         | 3.44                    | 0.32                          | 19.33                   |
| MPhS-C2:BTP-eC9:Se-Giant | 0.27                         | 23.71                   | 0.061                         | 103.00                  | 1.83                         | 3.43                    | 0.36                          | 17.55                   |

**Grazing incidence small angle X-ray scattering (GISAXS) characterization:** GISAXS measurements with  $K\alpha$  X-ray of Cu source (8.05 keV, 1.54 Å) and a Pilatus3R 300 K detector were conducted at a Xeuss 2.0 SAXS laboratory beamline. Samples were prepared by spin coating identical chloroform blend solutions as those used in devices on Si substrates. The grazing incident angle was 0.18°.

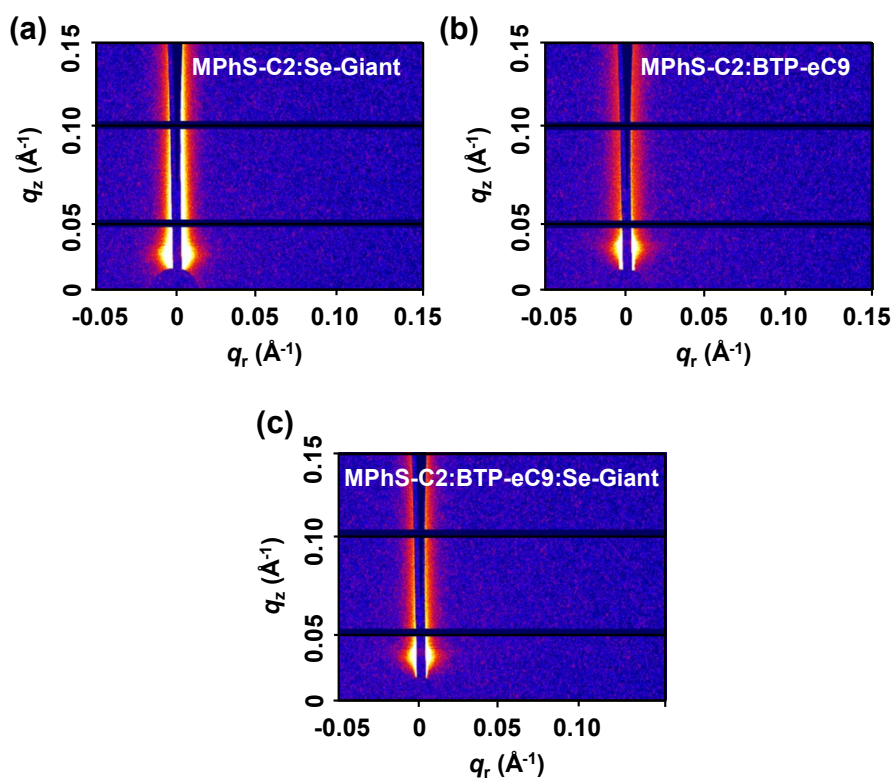

**Figure S26.** Relevant results of GISAXS measurement on (a) MPhS-C2:Se-Giant, (b) MPhS-C2:BTP-eC9, and (c) MPhS-C2:BTP-eC9:Se-Giant blend films.



## References

1. J. Yuan, Y. Zhang, L. Zhou, G. Zhang, H.-L. Yip, T.-K. Lau, X. Lu, C. Zhu, H. Peng, P. A. Johnson, M. Leclerc, Y. Cao, J. Ulanski, Y. Li and Y. Zou, *Joule*, 2019, **3**, 1140-1151.
2. X. Yang, R. Sun, Y. Wang, M. Chen, X. Xia, X. Lu, G. Lu and J. Min, *Adv. Mater.*, 2022, **35**, 2209350.
3. D. K. Owens and R. C. Wendt, *J. Appl. Polym. Sci.*, 2003, **13**, 1741-1747.
4. A. B. Svante Nilsson, Andrzej Budkowski, and Ellen Moons, *Macromolecules*, 2007, **40**, 8291-8301.
5. L. Zhang, D. Deng, K. Lu and Z. Wei, *Adv. Mater.*, 2024, **36**, 2302915.
6. H. Bin, Y. Yang, Z.-G. Zhang, L. Ye, M. Ghasemi, S. Chen, Y. Zhang, C. Zhang, C. Sun, L. Xue, C. Yang, H. Ade and Y. Li, *J. Am. Chem. Soc.*, 2017, **139**, 5085-5094.
7. M. A. Adil, J. Zhang, D. Deng, Z. Wang, Y. Yang, Q. Wu and Z. Wei, *ACS Appl. Mater. Interfaces*, 2018, **10**, 31526-31534.
8. H. Li, Y. Zhao, J. Fang, X. Zhu, B. Xia, K. Lu, Z. Wang, J. Zhang, X. Guo and Z. Wei, *Adv. Energy Mater.*, 2018, **8**, 1702377.
9. L. Xiao, T. Lai, X. Liu, F. Liu, T. P. Russell, Y. Liu, F. Huang, X. Peng and Y. Cao, *J. Mater. Chem. A*, 2018, **6**, 18469-18478.
10. K. Gao, S. B. Jo, X. Shi, L. Nian, M. Zhang, Y. Kan, F. Lin, B. Kan, B. Xu, Q. Rong, L. Shui, F. Liu, X. Peng, G. Zhou, Y. Cao and A. K. Y. Jen, *Adv. Mater.*, 2019, **31**, 1807842.
11. Q. Yue, H. Wu, Z. Zhou, M. Zhang, F. Liu and X. Zhu, *Adv. Mater.*, 2019, **31**, 1904283.
12. H. Chen, D. Hu, Q. Yang, J. Gao, J. Fu, K. Yang, H. He, S. Chen, Z. Kan, T. Duan, C. Yang, J. Ouyang, Z. Xiao, K. Sun and S. Lu, *Joule*, 2019, **3**, 3034-3047.
13. R. Zhou, Z. Jiang, C. Yang, J. Yu, J. Feng, M. A. Adil, D. Deng, W. Zou, J.

- Zhang, K. Lu, W. Ma, F. Gao and Z. Wei, *Nat. Commun.*, 2019, **10**, 5393.
14. Q. Wu, D. Deng, J. Zhang, W. Zou, Y. Yang, Z. Wang, H. Li, R. Zhou, K. Lu and Z. Wei, *Sci. China Chem.*, 2019, **62**, 837-844.
  15. Q. Wu, D. Deng, R. Zhou, J. Zhang, W. Zou, L. Liu, S. Wu, K. Lu and Z. Wei, *ACS Appl. Mater. Interfaces*, 2020, **12**, 25100-25107.
  16. R. Zhou, Z. Jiang, Y. Shi, Q. Wu, C. Yang, J. Zhang, K. Lu and Z. Wei, *Adv. Funct. Mater.*, 2020, **30**, 2005426.
  17. B. Qiu, Z. Chen, S. Qin, J. Yao, W. Huang, L. Meng, H. Zhu, Y. Yang, Z. G. Zhang and Y. Li, *Adv. Mater.*, 2020, **32**, 1908373.
  18. J. Ge, L. Xie, R. Peng, B. Fanady, J. Huang, W. Song, T. Yan, W. Zhang and Z. Ge, *Angew. Chem. Int. Ed.*, 2020, **59**, 2808-2815.
  19. J. Qin, C. An, J. Zhang, K. Ma, Y. Yang, T. Zhang, S. Li, K. Xian, Y. Cui, Y. Tang, W. Ma, H. Yao, S. Zhang, B. Xu, C. He and J. Hou, *Sci. China Mater.*, 2020, **63**, 1142-1150.
  20. J. Ge, L. Hong, W. Song, L. Xie, J. Zhang, Z. Chen, K. Yu, R. Peng, X. Zhang and Z. Ge, *Adv. Energy Mater.*, 2021, **11**, 2100800.
  21. J. Qin, Z. Chen, P. Bi, Y. Yang, J. Zhang, Z. Huang, Z. Wei, C. An, H. Yao, X. Hao, T. Zhang, Y. Cui, L. Hong, C. Liu, Y. Zu, C. He and J. Hou, *Energy Environ. Sci.*, 2021, **14**, 5903-5910.
  22. X. Wang, J. Wang, J. Han, D. Huang, P. Wang, L. Zhou, C. Yang, X. Bao and R. Yang, *Nano Energy*, 2021, **81**, 105612.
  23. S. Cai, P. Huang, G. Cai, X. Lu, D. Hu, C. Hu and S. Lu, *ACS Appl. Mater. Interfaces*, 2022, **14**, 14532-14540.
  24. L. Zhang, X. Zhu, D. Deng, Z. Wang, Z. Zhang, Y. Li, J. Zhang, K. Lv, L. Liu, X. Zhang, H. Zhou, H. Ade and Z. Wei, *Adv. Mater.*, 2021, **34**, 2106316.
  25. J. Ge, L. Hong, H. Ma, Q. Ye, Y. Chen, L. Xie, W. Song, D. Li, Z. Chen, K. Yu, J. Zhang, Z. Wei, F. Huang and Z. Ge, *Adv. Mater.*, 2022, **34**, 2202752.
  26. L. Zhang, R. Sun, Z. Zhang, J. Zhang, Q. Zhu, W. Ma, J. Min, Z. Wei and D. Deng, *Adv. Mater.*, 2022, **34**, 2207020.

27. W. Gao, M. Jiang, Z. Wu, B. Fan, W. Jiang, N. Cai, H. Xie, F. R. Lin, J. Luo, Q. An, H. Y. Woo and A. K. Y. Jen, *Angew. Chem. Int. Ed.*, 2022, **61**, e202205168.
28. Y. Chang, X. Zhu, Y. Shi, Y. Liu, K. Meng, Y. Li, J. Xue, L. Zhu, J. Zhang, H. Zhou, W. Ma, Z. Wei and K. Lu, *Energy Environ. Sci.*, 2022, **15**, 2937-2947.
29. Z. Li, X. Wang, N. Zheng, A. Saparbaev, J. Zhang, C. Xiao, S. Lei, X. Zheng, M. Zhang, Y. Li, B. Xiao and R. Yang, *Energy Environ. Sci.*, 2022, **15**, 4338-4348.
30. S. Wu, W. Feng, L. Meng, Z. Zhang, X. Si, Y. Chen, X. Wan, C. Li, Z. Yao and Y. Chen, *Nano Energy*, 2022, **103**, 107801.
31. L. Meng, M. Li, G. Lu, Z. Shen, S. Wu, H. Liang, Z. Li, G. Lu, Z. Yao, C. Li, X. Wan and Y. Chen, *Small*, 2022, **18**, 2201400.
32. M. Jiang, H.-F. Zhi, B. Zhang, C. Yang, A. Mahmood, M. Zhang, H. Y. Woo, F. Zhang, J.-L. Wang and Q. An, *ACS Energy Lett.*, 2023, **8**, 1058-1067.
33. D. Hu, H. Tang, S. Karuthedath, Q. Chen, S. Chen, J. I. Khan, H. Liu, Q. Yang, J. Gorenflot, C. E. Petoukhoff, T. Duan, X. Lu, F. Laquai and S. Lu, *Adv. Funct. Mater.*, 2022, **33**, 2211873.
34. K. Ma, W. Feng, H. Liang, H. Chen, Y. Wang, X. Wan, Z. Yao, C. Li, B. Kan and Y. Chen, *Adv. Funct. Mater.*, 2023, **33**, 2214926.
35. Y. Gao, X. Yang, W. Wang, R. Sun, J. Cui, Y. Fu, K. Li, M. Zhang, C. Liu, H. Zhu, X. Lu and J. Min, *Adv. Mater.*, 2023, **35**, 2300531.
36. Y. Gao, X. Yang, R. Sun, L.-Y. Xu, Z. Chen, M. Zhang, H. Zhu and J. Min, *Joule*, 2023, **7**, 2845-2858.
37. Q. Zhang, B. Kan, X. Wan, H. Zhang, F. Liu, M. Li, X. Yang, Y. Wang, W. Ni, T. P. Russell, Y. Shen and Y. Chen, *J. Mater. Chem. A*, 2015, **3**, 22274-22279.
38. A. Armin, J. Subbiah, M. Stolterfoht, S. Shoaee, Z. Xiao, S. Lu, D. J. Jones and P. Meredith, *Adv. Energy Mater.*, 2016, **6**, 1600939.
39. Z. Zhou, S. Xu, J. Song, Y. Jin, Q. Yue, Y. Qian, F. Liu, F. Zhang and X. Zhu, *Nat. Energy*, 2018, **3**, 952-959.
40. H. Tang, T. Xu, C. Yan, J. Gao, H. Yin, J. Lv, R. Singh, M. Kumar, T. Duan, Z.

- Kan, S. Lu and G. Li, *Adv. Sci.*, 2019, **6**, 1901613.
41. T. Xu, J. Lv, K. Yang, Y. He, Q. Yang, H. Chen, Q. Chen, Z. Liao, Z. Kan, T. Duan, K. Sun, J. Ouyang and S. Lu, *Energy Environ. Sci.*, 2021, **14**, 5366-5376.
  42. T. Xu, J. Lv, D. Zheng, Z. Luo, M. H. Jee, G. Ran, Z. Chen, Z. Huang, J. Ren, Y. Li, C. e. Zhang, H. Hu, T. Pauporté, W. Zhang, H. Y. Woo and C. Yang, *Energy Environ. Sci.*, 2023, **16**, 5933-5943.
  43. L. Yang, S. Zhang, C. He, J. Zhang, Y. Yang, J. Zhu, Y. Cui, W. Zhao, H. Zhang, Y. Zhang, Z. Wei and J. Hou, *Chem. Mater.*, 2018, **30**, 2129-2134.
  44. K. Sun, Z. Xiao, S. Lu, W. Zajaczkowski, W. Pisula, E. Hanssen, J. M. White, R. M. Williamson, J. Subbiah, J. Ouyang, A. B. Holmes, W. W. H. Wong and D. J. Jones, *Nat. Commun.*, 2015, **6**, 6013.
  45. X. Cheng, Z. Liang, S. Liang, X. Zhang, J. Xu, Y. Xu, W. Ni, M. Li and Y. Geng, *J. Mater. Chem. A*, 2023, **11**, 13984-13993.
  46. L. Yang, J. Qin, S. Li, J. Zhang, Y. Yang, B. Cao, C. He and J. Hou, *Energy Fuels*, 2021, **35**, 19756-19764.
  47. X. Zhu, B. Xia, K. Lu, H. Li, R. Zhou, J. Zhang, Y. Zhang, Z. Shuai and Z. Wei, *Chem. Mater.*, 2016, **28**, 943-950.
  48. R. Sun, Y. Wu, J. Guo, Y. Wang, F. Qin, B. Shen, D. Li, T. Wang, Y. Li, Y. Zhou, G. Lu, Y. Li and J. Min, *Energy Environ. Sci.*, 2021, **14**, 3174-3183.
  49. P. Yin, Y. Ma and Q. Zheng, *J. Mater. Chem. A*, 2022, **10**, 10400-10407.
  50. J. Min, X. Jiao, V. Sgobba, B. Kan, T. Heumüller, S. Rechberger, E. Spiecker, D. M. Guldi, X. Wan, Y. Chen, H. Ade and C. J. Brabec, *Nano Energy*, 2016, **28**, 241-249.
  51. M. J. Newman, E. M. Speller, J. Barbé, J. Luke, M. Li, Z. Li, Z.-K. Wang, S. M. Jain, J.-S. Kim, H. K. H. Lee and W. C. Tsoi, *Sci. Technol. Adv. Mater.*, 2018, **19**, 194-202.
  52. S. Li, Q. Ma, B. Qiu, L. Meng, J. Zhang, Y. Wu, Z. Zhang, Z.-G. Zhang and Y. Li, *Solar RRL*, 2021, **5**, 2100515.
  53. R. Cheacharoen, W. R. Mateker, Q. Zhang, B. Kan, D. Sarkisian, X. Liu, J. A.

- Love, X. Wan, Y. Chen, T.-Q. Nguyen, G. C. Bazan and M. D. McGehee, *Sol. Energy Mater. Sol. Cells*, 2017, **161**, 368-376.
54. Y. Qin, N. Balar, Z. Peng, A. Gadisa, I. Angunawela, A. Bagui, S. Kashani, J. Hou and H. Ade, *Joule*, 2021, **5**, 2129-2147.
55. M. Ghasemi, N. Balar, Z. Peng, H. Hu, Y. Qin, T. Kim, J. J. Rech, M. Bidwell, W. Mask, I. McCulloch, W. You, A. Amassian, C. Risko, B. T. O'Connor and H. Ade, *Nat. Mater.*, 2021, **20**, 525-532.
